# Supplementary material
Source: ML conference proceedings conference paper supplement (https://proceedings.neurips.cc/paper_files/paper/2019/hash/107878346e1d8f8fe6af7a7a588aa807-Abstract.html)
Supplement: Supplementary file 1 [file 107878346e1d8f8fe6af7a7a588aa807-Supplemental.zip]

## A Preliminaries

The work of [10] defines the notion of adversarial VC dimension to bound the generalization gap for robust empirical risk minimization. Additionally, the authors show that for linear classifiers the adversarial VC dimension remains the same as that of the original class. The bound below then follows by viewing PTFs as linear classifiers in a higher dimensional space.

**Lemma A.1.** *Let  $\mathcal{F}$  be a class of degree- $d$  polynomial threshold functions from  $\mathbb{R}^n \mapsto \{-1, 1\}$  of VC dimension  $\Delta = O(n^d)$ . Given  $\delta, \eta > 0$ , and a set  $S$  of  $m$  examples  $(x_1, y_1), \dots, (x_m, y_m)$  generated from a distribution  $D$  over  $\mathbb{R}^n \times \{-1, 1\}$ , with probability at least  $1 - \eta$ , we have that  $\sup_{f \in \mathcal{F}} |\text{err}_{\delta, D}(f) - \hat{\text{err}}_{\delta, S}(f)| \leq 2\sqrt{2\Delta \log m/m} + \sqrt{\log(1/\eta)/(2m)}$ .*

## B Experiments

In this section, we evaluate the performance of the SDP based rounding algorithm outlined in Figure 3 to generate adversarial examples for depth-2 neural networks with ReLU gates, and compare it with the projected gradient descent (PGD) based attack of Madry et al. [24]. We will show that our approach indeed finds more adversarial examples. This however, comes at a computational cost since we need to solve one SDP per example and per pair of classes. We use the MNIST data set and our two layer neural network has  $d = 784$  input units,  $k = 1024$  hidden units and 10 output units. This leads to an SDP with  $d + k + 1$  vector variables. On a standard desktop with Intel i5 4590 processor, and 4 cores 3.30GHz, solving one SDP instance takes 200 seconds on average. As a consequence we perform our experiments on randomly chosen subsets of the MNIST data set. Another optimization we perform for computational reasons is that given an example  $x$  with predicted class  $i$ , rather than checking for every class  $j$ , if one can find an attack example  $z$  that misclassifies  $x + z$  to be in class  $j$ , we simply pick  $j$  to be the class label of the second highest prediction at  $x$ . Hence, the numbers we report below are an underestimate of the effectiveness of the full SDP based algorithm

We compare the effectiveness of our attack in finding adversarial examples when compared to the PGD based attack of Madry et al. [24]. We consider two settings of the parameter  $\delta$ , the maximum amount by which each pixel can be perturbed to produce a valid attack example. As in [24] we first choose  $\delta = 0.3$  and train a robust 2-layer network using the algorithm of Madry et al. [24]. We then run the PGD attack and divide the test set into examples where the PGD attack succeeds (PGDPass) and examples where the PGD attack fails (PGDfail). We then run our attack on batches of random subsets chosen from each set. In the algorithm we set  $\delta' = \alpha\delta$  for a hyperparameter  $\alpha \leq 1$ . This is because we want to ensure that the rounded solutions have  $\ell_\infty$  norm of at most  $\delta$ . In our experiment we set  $\alpha = 0.07$ . The first row of Table 1 shows the precision and recall of our method. We report the average and the standard deviation across the chosen batches. As one can see, our method has very high recall, i.e., whenever the PGD attack succeeds, our SDP based algorithm also finds adversarial examples. Furthermore, on examples where the PGD attack fails, our method is still able to discover new adversarial examples 30% of the time. Please see Figure 4 for the images corresponding to some of the examples where the SDP based attack succeeds, but the PGD attack fails and Figure 5 for the images of some examples where both the PGD attack and SDP based attack succeed. A visual inspection of both the figures reveals that our attack often produces sparse targeted attacks as opposed to PGD attack.

We repeat the same methodology with  $\delta = 0.01, \alpha = 0.2$ . Here we notice that PGD attack succeeds on only 138 test examples and hence we can afford to run our attack on all of them. As can be seen from the second row of Table 2 our attack succeeds on all of these examples. Furthermore, we rank the examples in PGDfail according to the difference of the highest and the second highest of the ten network outputs. The smaller the difference, the easier it should be to find an adversarial example. Indeed as can be seen from the table, our method finds 45 new adversarial examples out of the first 100 such ranked examples.

The experiments above suggest that our algorithms can lead to improved adversarial attacks. We would like to note that the recent work of [29] also studied semi-definite programming based methods for providing adversarial certificates for 2-layer neural networks. However, our SDP as outlined in Figure 3 is strictly stronger. In particular, the SDP of [29] is independent

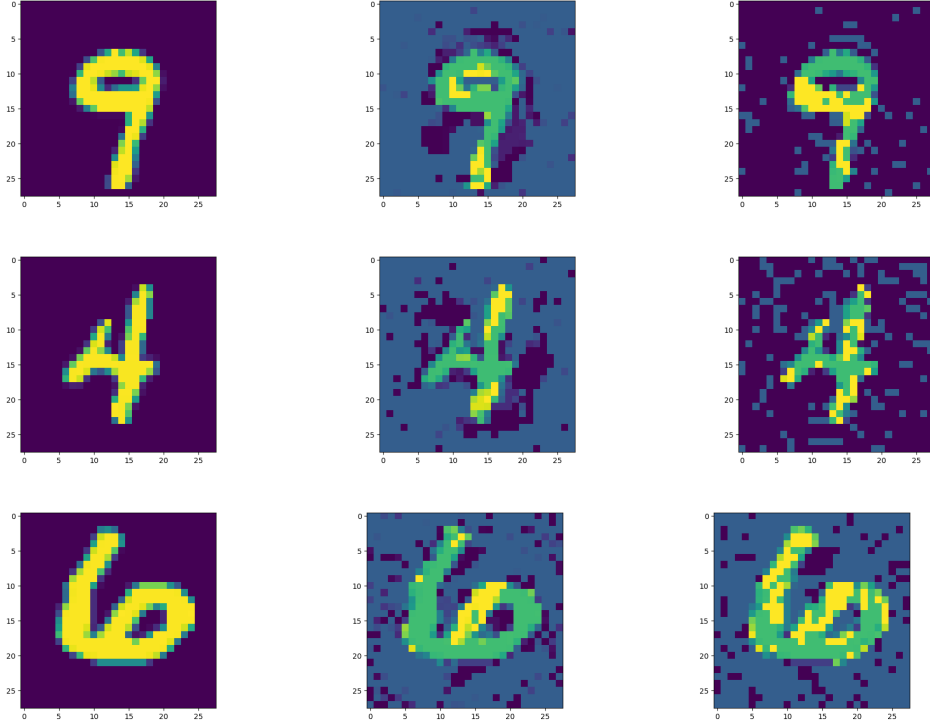

Figure 4: The figure shows three MNIST random samples from PGDfail (i.e., examples where PGDattack failed to find an adversarial perturbation), where SDPattack successfully finds adversarial perturbations for  $\delta = 0.3$ . The images in the first column represent the original images corresponding to three, the second column represents the perturbed images produced by the failed PGDattack, and perturbed images produced by the successful SDPattack. Visual inspection of these examples suggest that our method often produces sparse targeted perturbations.

| $\delta = 0.3$  | PGDpass ( $6 \times 50$ random samples)               | PGDfail ( $8 \times 100$ random samples)             |
|-----------------|-------------------------------------------------------|------------------------------------------------------|
| SDP succeeds    | 297 out of 300 total<br>Mean : 49.5 of 50, Std : 0.76 | 244 out of 800 total<br>Mean 30.6 of 100, Std : 2.87 |
| $\delta = 0.01$ | PGDpass (138 samples)                                 | PGDfail (100 ranked)                                 |
| SDP succeeds    | 138                                                   | 45                                                   |

Table 2: For  $\delta = 0.3$ , we report mean and standard deviation of number of adversarial examples found by running our SDPattack algorithm on 6 batches of 50 random examples from PGDpass and 8 batches of 100 random samples from PGDfail. For  $\delta = 0.01$ , we run SDPattack on all 138 examples in PGDpass and first 100 sorted examples from PGDfail.

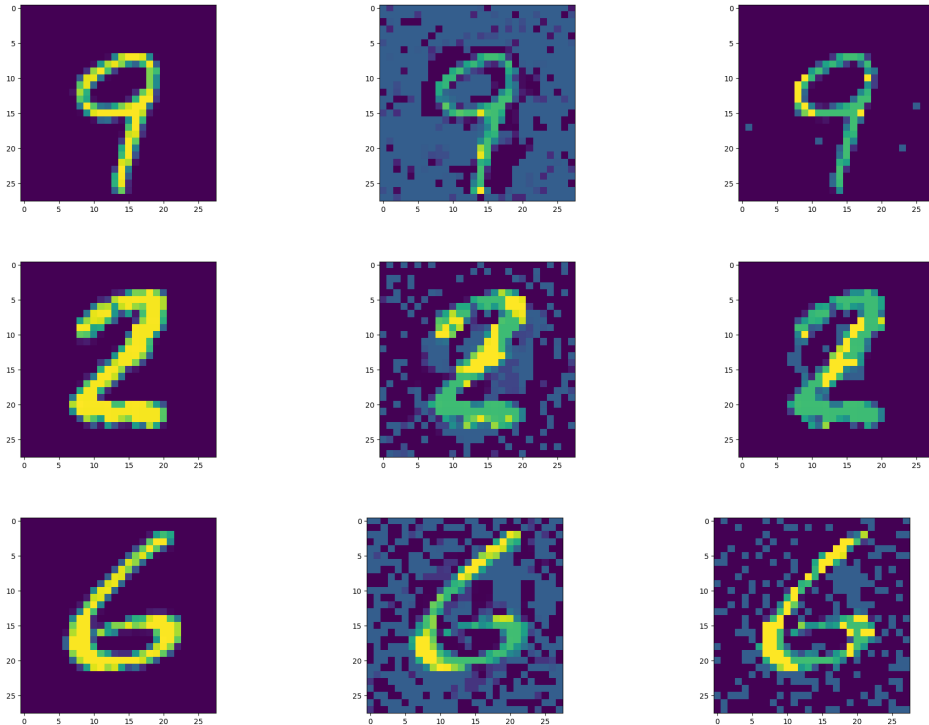

Figure 5: The figure shows three MNIST random samples from PDGpass (i.e., examples where PGDattack succeeded to find an adversarial perturbation), where SDPattack successfully finds adversarial perturbations for  $\delta = 0.3$ . The images in the first column represent the original images corresponding to three, the second column represents the perturbed images produced by the successful PGDattack, and perturbed images produced by the successful SDPattack. Visual inspection of these examples suggest that our method often produces sparse targeted perturbations.

of the given example  $x$  and as a result we expect our method to produce better certificates. We leave as future work the task of making our theoretical analysis practical for large scale applications.

## C Related Work

As mentioned in the introduction, there has been a recent explosion of works on understanding adversarial robustness from both empirical and theoretical aspects. Here we choose to discuss the theoretical works that are the most relevant to our paper. We refer the interested reader to a recent paper by [15] for a broader discussion. Prior to their relevance for deep networks, robust optimization problems have been studied in machine learning and other domains. The works of [5, 17, 31] studies optimization heuristics for optimizing a robust loss that can handle noisy or missing data. The works of [36, 37] proved an equivalence between robust optimization and various regularized variants of SVMs. They used this relation to re-derive standard generalization bounds for SVMs and their kernel versions. Akin to classifier stability, these bounds depend on the robustness of the classifier on the training set. A recent work of [6] views deep networks as functions in an RKHS and designs new norm based regularization algorithms to achieve robustness.

Motivated by connections to deep networks a recent line of work studies generalization bounds for robust learning. The work of [30] provides specific constructions of a linear binary classification task where a single example is enough to learn the problem in the usual sense,

i.e., to achieve low test error, whereas learning the problem robustly requires a significantly large training set. The authors also show that in certain cases, non-linearity can help reduce the sample complexity of robust learning. The work of [10] proposes a PAC model for robust learning and defines adversarial VC dimension as a combinatorial quantity that captures robust learning via robust empirical risk minimization (ERM). The authors show that for linear classifiers the adversarial VC dimension is the same as the VC dimension, although there are functions classes and distributions where the gap between the two quantities could be much higher. The recent works of [38] and [21] analyze Rademacher complexity of robust loss functions classes. In particular, it is observed that even for linear models with bounded weight norm, there is an unavoidable dependence on the data dimension in the Rademacher complexity of robust loss function classes. These results point to the fact that for many distributions robust learning could require many more training samples than their non-robust counterpart. The work of [13, 4] studies algorithms and generalization bounds for a model where the adversary can choose perturbations from a known finite set of small size  $k$ .

Another recent line of work studies the trade-off between traditional test error and robust error. The work of [34] designs a classification task that is efficiently learnable with a linear classifier to low standard error, but has the property that any classifier that achieves low test error will have high robust error on the task. The work of [16] designs a task that is learnable by a degree-2 polynomial and relates the test error of any model to its robust error. Similar conclusions have been observed in [25, 26, 11] and have been used to design various data poisoning attacks. These results essentially follows from the use of isoperimetric inequalities for distributions such as the Gaussian and the uniform distribution over the Boolean hypercube. However, as noted in [16], it is not clear if the same relation holds between test error and robust error for real world data distributions. The work of [12] relates robustness to the curvature of the decision boundary and uses it to quantify robustness to random perturbations.

Yet another line of work concerns the design of certificates of perturbation robustness or distributional robustness of a given classifier (e.g., deep neural networks) at a given point [35, 29, 32]. This is achieved by the use of convex relaxations of the optimal robustness at a given point. These works also conclude that by augmenting the training objective with a penalty that depends on the certificates, one can empirically achieve increased robustness. However these algorithms do not give any guarantees for relating the bound achieved by the certificate of robustness to the optimal robustness around a given point.

The work of Bubeck et al. [7, 8] provides a cryptographic lower bound by designing a computational task in  $\mathbb{R}^n$  that is robustly learnable using  $\text{poly}(n)$  samples to any given robustness parameter  $M$ , but is hard to learn robustly to any non-trivial robustness parameter  $\varepsilon > 0$ , in polynomial time. When translated to our model, this provides an instance of a cryptographic learning task that is computationally hard to  $\gamma$ -approximately robustly learn for any constant  $\gamma \geq 1$ . However, this does not rule out the possibility that natural function classes can be robustly learned without any loss in robustness parameter. Our result rules this out for the class of degree-2 and higher PTFs, even in the realizable setting, i.e., when there exists a robust classifier of zero error! Finally, to the best of our knowledge, our upper bounds are the first to establish the robustness tradeoff for computationally efficient learning for a large natural class of functions.

## D Finding Adversarial Examples using Polynomial Optimization for PTFs

In this section we introduce the broad class of polynomial optimization problems which are useful in designing adversarial (test-time) examples with provable guarantees for polynomial threshold functions (PTFs), and depth-2 neural networks with RELU gates. These polynomial optimization problems are generalizations of well-studied combinatorial optimization problems like the *Grothendieck problem* and computing operator norms of matrices. We then design algorithms with provable guarantees for some of these classes. Proposition 3.1 restated below illustrates the connection and motivates the family of optimization problems that arise when designing algorithms with provable guarantees for finding adversarial examples for  $\text{sgn}(g(x))$ .

While our theory below is stated for binary classifiers, it is easily extended to multiclass classification.

**Proposition D.1.** *[Same as Proposition 3.1] Let  $\gamma \geq 1$ . There is an efficient algorithm that given a classifier  $\text{sgn}(f(x))$  and a point  $x^*$ , and budget  $\delta > 0$ , guarantees to either (a) find an adversarial example in  $B_\infty^n(x^*, \gamma\delta)$ , or (b) certify the absence of any adversarial example in  $B_\infty^n(x^*, \delta)$ , given access to an efficient optimization algorithm that takes  $x^*$  and a polynomial  $g(z) \in \{f(x^* + z), -f(x^* + z)\}$  as input and finds a  $\hat{z}$  such that  $g(\hat{z}) \geq \max_{\|z\|_\infty \leq \delta} g(z)$  with  $\|\hat{z}\|_\infty \leq \gamma\delta$ .*

*Proof of Proposition 3.1.* Let  $\text{ALG}_\gamma$  be the optimization algorithm. Suppose there exists an adversarial example  $x^* + z^*$  with  $\|z^*\|_\infty \leq \delta$ , and let  $y^* := \text{sgn}(f(x^*))$  be the label for the point  $x^*$ . Then we have that  $\max_{z: \|z\|_\infty \leq \delta} (-y^*)f(x^* + z) > (-y^*)f(x^* + z^*) > 0$ . Now for  $g(z) = -y^*f(x^* + z)$  (a polynomial in  $z$ ), we get that  $\text{ALG}_\gamma$  finds a point  $\hat{z}$  with  $\|\hat{z}\|_\infty \leq \gamma\delta$  that also satisfies  $(-y^*)f(x^* + \hat{z}) > 0$  i.e.,  $\text{sgn}(f(x^*)) \neq \text{sgn}(f(x^* + \hat{z}))$ , as required. Furthermore, if  $\text{ALG}_\gamma$  fails, i.e., outputs a  $\hat{z}$  such that  $(-y^*)f(x^* + \hat{z}) < 0$ , then from the guarantee of the algorithm we know that  $\max_{z: \|z\|_\infty \leq \delta} (-y^*)f(x^* + z) < 0$  and hence no adversarial example exists within a  $\delta$  ball around  $x^*$ .  $\square$

The proposition above also holds for randomized algorithms. While the proof of the proposition only requires that the algorithm returns  $\hat{z}$  with  $g(\hat{z}) > 0$ , it effectively requires that  $\hat{z}$  attains at least as large an objective value because the constant term can be arbitrary. When the classifier is a degree- $d$  PTF of the form  $\text{sgn}(f)$ , it leads to the following approximate optimization problem: given as input a degree  $d$  polynomial  $g: \mathbb{R}^n \rightarrow \mathbb{R}$  (potentially different from  $f$ ) and any  $\eta, \delta > 0$ , find in time  $\text{poly}(n, \log(\frac{1}{\eta}))$  and w.p. at least  $1 - \eta$  a point  $\hat{x}$  s.t.

$$g(\hat{x}) \geq \max_{x \in B_\infty^n(0, \delta)} g(x) \text{ and } \hat{x} \in B_\infty^n(0, \gamma\delta). \quad (3)$$

The above problem is closely related to the standard approximation variant of polynomial maximization problem where the goal is to obtain, in polynomial time, an objective value as close to the optimal one, without violating the  $\|\cdot\|_\infty$  ball constraint. Instead, our problem asks for the same objective value at the cost of an increase in the radius of the optimization ball.<sup>1</sup> This changes the flavor of the problem, and introduces new challenges particularly when the polynomial  $g$  is non-homogenous.

We begin with the following simple claim about degree-1 PTFs.

**Claim D.2** (Same as Claim 3.2). *There is a deterministic linear-time algorithm that given any linear threshold function  $\text{sgn}(b^T x + c)$ , a point  $x^*$  and  $\delta > 0$ , provably finds an adversarial example in the  $\ell_\infty$  ball of  $\delta$  around  $x^*$  when it exists.*

*Proof.* We use Proposition 3.1 applied with linear functions. For linear function  $g(x)$  represented by  $g(x) := b^T x + c$  where  $b \in \mathbb{R}^n, c \in \mathbb{R}$ , we can easily find a solution  $\hat{x} \in B_\infty^n(0, \delta)$  such that  $g(\hat{x}) = \max_{x \in B_\infty^n(0, \delta)} g(x)$ . This is because the linear form  $b^T x + c$  is maximized within  $B_\infty^n(0, \delta)$  by setting each variable  $x_i$  to be  $\delta$  if the corresponding  $b_i \geq 0$ , and  $-\delta$ , otherwise.  $\square$

As we will see in Section 4, this will further be used to give robust learning algorithms for linear threshold functions. Our main theoretical result of this section gives an algorithm for provably finding adversarial examples for degree-2 PTFs.

**Theorem D.3** (Same as Theorem 3.3). *For any  $\delta, \eta > 0$ , there is a polynomial time algorithm that given a degree-2 PTF  $\text{sgn}(f(x))$  and a example  $(x^*, \text{sgn}(f(x^*)))$ , guarantees at least one of the following holds with probability at least  $(1 - \eta)$ : (a) finds an adversarial example  $(x^* + \hat{z})$  i.e.,  $\text{sgn}(f(x^*)) \neq \text{sgn}(f(x^* + \hat{z}))$ , with  $\|\hat{z}\|_\infty \leq C\delta\sqrt{\log n}$ , or (b) certifies that  $\forall z: \|z\|_\infty \leq \delta, \text{sgn}(f(x^*)) = \text{sgn}(f(x^* + z))$  for some constant  $C > 0$ .*

<sup>1</sup>In approximation algorithms literature this will correspond to obtaining a  $(1, \gamma)$ -bicriteria approximation.

To establish the above theorem using Proposition 3.1, we need to design a polynomial time algorithm that given any degree-2 polynomial  $g(x) = x^T A x + b^T x + c$  with  $A \in \mathbb{R}^{n \times n}$ ,  $b \in \mathbb{R}^n$ ,  $c \in \mathbb{R}$ , finds a solution  $\hat{x}$  with  $\|\hat{x}\|_\infty \leq O(\sqrt{\log n}) \cdot \delta$  such that  $g(\hat{x}) \geq \max_{\|x\|_\infty \leq \delta} g(x)$ .

To prove the theorem we use a semi-definite programming (SDP) based algorithm that is directly inspired by the SDP-based algorithm for quadratic programming (QP) by [27, 9]. However, the goal in quadratic programming is to find an assignment  $x \in \{-1, 1\}^n$  that maximizes  $\sum_{i \neq j} a_{ij} x_i x_j$ . There are three main differences from the QP problem. Firstly, unlike QP which finds a solution with  $\|x\|_\infty = 1$  with sub-optimal objective value, our goal is to output a solution which attains at least as large a value as  $\max_{\|x\|_\infty \leq \delta} g(x)$  while violating the  $\ell_\infty$  length of the vector. Secondly, unlike QP where the diagonal terms are all 0, in our problem the diagonal terms can be non-zero and hence it is no longer true that the solution with  $\|x\|_\infty \leq 1$  will have each co-ordinate being  $\{\pm 1\}$ . Finally and most crucially, QP corresponds to optimizing a homogeneous degree 2 polynomial, with no linear term. These challenges necessitates non-trivial modifications to the algorithm and in the analysis. We also remark that it seems unlikely that the upper bound of  $O(\sqrt{\log n})$  on the approximation factor can be improved even for the special case of homogenous degree-2 polynomials, based on the current state of the approximability of Quadratic Programming (see Remark D.5 for details).

The SDP we consider is given by the following equivalent vector program (the SDP variables correspond to  $X_{ij} = \langle u_i, u_j \rangle$ ), which can be solved in polynomial time up to arbitrary additive error (using the Ellipsoid algorithm).

$$\max_{\{u_0, u_1, \dots, u_n\}} \sum_{i,j=1}^n A_{ij} \langle u_i, u_j \rangle + \sum_{i=1}^n b_i \langle u_i, u_0 \rangle + c \quad (4)$$

$$\text{s.t. } \|u_i\|_2^2 \leq \delta^2 \quad \forall i \in \{1, 2, \dots, n\}, \text{ and } \|u_0\|_2^2 = 1. \quad (5)$$

Let  $\text{SDP}_{val}$  denote the optimal value of the above SDP relaxation. Clearly the above SDP is a valid relaxation of the problem; for any valid solution  $x \in [-\delta, \delta]^n$ , consider the solution given by  $(u_i = x_i u_0 : i \in [n])$  for any unit vector  $u_0$ . Hence  $\text{SDP}_{val} \geq \max_{\|x\|_\infty \leq \delta} g(x)$ . Moreover, when the SDP value  $\text{SDP}_{val}$  is negative, this certifies that the classifier is robust around the give sample  $x^*$ . We prove Theorem 3.3 by designing a polynomial time rounding algorithm that takes the SDP solution and obtained a valid  $\hat{z}$  satisfying the requirements of the theorem.

**Rounding Algorithm.** Given the SDP solution, let  $u_i^\perp$  represent the component of  $u_i$  orthogonal to  $u_0$ . Consider the following randomized rounding algorithm that returns a solution  $\{\hat{x}_i : i \in [n]\}$  :

$$\forall i \in \{0, 1, \dots, n\}, \quad \hat{x}_i := \langle u_i, u_0 \rangle + \langle u_i, \zeta \rangle = \langle u_i, u_0 \rangle + \langle u_i^\perp, \zeta \rangle, \text{ with } \zeta \sim N(0, \Pi^\perp), \quad (6)$$

where  $\Pi^\perp$  is the projection matrix onto the subspace of  $\text{span}(\{u_1, \dots, u_n\})$  that is orthogonal to  $u_0$ . For convenience, we can assume without loss of generality that  $u_0 = e_0$ , where  $e_0$  is a standard basis vector, and  $u_i \in \mathbb{R}^{n+1}$ . Let  $e_0, e_1, \dots, e_n$  represent an orthogonal basis for  $\mathbb{R}^{n+1}$ . Then

$\forall i \in \{0, 1, \dots, n\}$ ,  $\hat{x}_i = \langle u_i, u_0 \rangle + \langle u_i^\perp, \zeta \rangle$  where  $\langle \zeta, e_0 \rangle = 0$ ,  $\langle \zeta, v \rangle \sim N(0, \|v\|_2^2)$  for every  $v \perp e_0$ , and  $\hat{x}_0 = 1$ . The rounding algorithm just tries  $O(\log(1/\eta))$  independent random draws for  $\zeta$ , and picks the best of these solutions.

We now give the analysis of the algorithm. We prove Theorem 3.3 by showing the following guarantee for the rounding algorithm.

**Lemma D.4.** *There is a polynomial time randomized rounding algorithm that takes as input the solution of the SDP as defined in Equations 4, and 5, and outputs a solution  $\hat{x}$  such that*

$$\mathbb{P}_x \left[ g(\hat{x}) \geq \max_{\|x\|_\infty \leq \delta} g(x) \text{ and } \|\hat{x}\|_\infty \leq O(\sqrt{\log n}) \cdot \delta \right] \geq \Omega(1). \quad (7)$$

Assuming (7), we can repeat the algorithm at least  $O(\log(1/\eta))$  times to get the guarantee of Theorem 3.3.

*Proof of Lemma D.4.* We start with a simple observation that follows from the standard properties of spherical Gaussians. For any  $i, j \in [n]$ , we have  $\mathbb{E}_\zeta[\langle u_i^\perp, \zeta \rangle \langle u_j^\perp, \zeta \rangle] = (u_i^\perp)^T \Pi^\perp u_j^\perp = \langle u_i^\perp, u_j^\perp \rangle$ . Hence we get the key observation that for  $\forall i, j \in \{0, \dots, n\}$ ,

$$\begin{aligned} \mathbb{E}_\zeta[\widehat{x}_i \widehat{x}_j] &= \mathbb{E}_\zeta\left[\left(\langle u_i, u_0 \rangle + \langle u_i^\perp, \zeta \rangle\right)\left(\langle u_j, u_0 \rangle + \langle u_j^\perp, \zeta \rangle\right)\right] = \langle u_i, u_0 \rangle \langle u_j, u_0 \rangle + \mathbb{E}_\zeta\left[\langle u_i^\perp, \zeta \rangle \langle u_j^\perp, \zeta \rangle\right] \\ &= \langle u_i, u_0 \rangle \langle u_j, u_0 \rangle + \langle u_i^\perp, u_j^\perp \rangle = \langle u_i, u_j \rangle. \end{aligned} \quad (8)$$

Note that this also holds when  $i = j$ . We now consider the expected value of  $g(\widehat{x})$ . Using (8),  $\widehat{x}_0 = 1$  and since  $\mathbb{E}_\zeta[\langle u_i^\perp, \zeta \rangle] = 0$ , we have

$$\begin{aligned} \mathbb{E}[g(\widehat{x})] &= \sum_{i,j=1}^n A_{ij} \mathbb{E}_\zeta[\widehat{x}_i \widehat{x}_j] + \sum_{i=1}^n b_i \mathbb{E}_\zeta[\widehat{x}_i \widehat{x}_0] + c \mathbb{E}_\zeta[\widehat{x}_0^2] \\ &= \sum_{i,j=1}^n A_{ij} \langle u_i, u_j \rangle + \sum_{i=1}^n b_i \langle u_i, u_0 \rangle + c \|u_0\|_2^2 = \text{SDP}_{val}. \end{aligned} \quad (9)$$

We now show that  $\widehat{x}_i \leq O(\sqrt{\log n}) \cdot \delta$  w.h.p. For each fixed  $i \in \{1, \dots, n\}$ ,  $\langle u_i^\perp, \zeta \rangle$  is distributed as a Gaussian with mean 0 and variance  $\|u^\perp\|_2^2 \leq \delta^2$ ,

$$|\widehat{x}_i| \leq |\langle u_i, u_0 \rangle| + |\langle u_i^\perp, \zeta \rangle| \leq \delta + |\langle u_i^\perp, \zeta \rangle| \leq \sqrt{C \log n} \cdot \delta \text{ with probability at least } 1 - 1/n^{C/2},$$

using standard tail properties of Gaussians. Hence, using a union bound over all  $i \in [n]$ , we have that

$$\mathbb{E}[g(\widehat{x})] \geq \max_{\|x\|_\infty \leq \delta} g(x), \quad \text{and} \quad \mathbb{P}\left[\|\widehat{x}\|_\infty \leq O(\sqrt{\log n}) \cdot \delta\right] \geq 1 - \frac{1}{n^2}. \quad (10)$$

for  $C \geq 4$ . Further note that  $g(\widehat{x})$  can be expressed a degree- $d$  polynomial of the Gaussian vector  $\zeta$ . Hence using hypercontractivity of low-degree polynomials [28, Theorem 10.23], we have

$$\mathbb{P}_\zeta\left[g(\widehat{x}) \geq \mathbb{E}_\zeta g(\widehat{x})\right] \geq \Omega(1).$$

Hence (7) follows.  $\square$

*Remark D.5.* Obtaining an approximation factor of  $O(\gamma)$  in the  $\ell_\infty$  norm of  $\widehat{z}$ , even for the special case of homogeneous degree-2 polynomials  $\sum_{i < j=1}^n a_{ij} x_i x_j$  with no diagonal entries ( $a_{ii} = 0 \forall i \in [n]$ ) over  $\|x\|_\infty \leq \delta$  is equivalent to obtaining a  $O(\gamma^2)$ -factor approximation algorithm for the problem called Quadratic Programming (QP) which maximizes  $\sum_{i < j=1}^n a_{ij} x_i x_j$  over  $x \in \{-1, 1\}^n$  (this is also called the Grothendieck problem on complete graphs). The best known approximation algorithm for Quadratic Programming (QP) gives an  $O(\log n)$ -factor approximation in polynomial time [27, 9]. Further [3] showed that it is hard to approximate QP within a  $O(\log^c n)$  for some universal constant  $c > 0$  assuming NP does not have quasi-polynomial time algorithms. Moreover integrality gaps for SDP relaxations [1, 23] suggest that  $O(\log n)$  factor maybe be tight for polynomial time algorithms. Hence even for the special case of homogeneous degree-2 polynomials, improving upon the bound of  $\sqrt{\log n}$  in the approximation factor seems unlikely.

## E From Adversarial Examples to Provable Learning Algorithms

*Proof of Theorem 4.2.* Let  $\eta > 0$  be the success probability desired for the robust learning algorithm and  $\varepsilon > 0$  be the final robust error that is desired. Let  $\mathcal{B}$  be an algorithm that achieves the  $\gamma$ -factor admissibility for the class  $\mathcal{F}$ . Given  $S$ , we will run the Ellipsoid algorithm on the convex program in Figure 2. Let  $T(m, n)$  be a (polynomial) upper bound on the number of iterations of the algorithm. In each iteration, for each  $i \in [m]$ , we run  $\mathcal{B}$  on the polynomial  $y_i g(x_i + z)$ , where  $z$  is the variable and  $x_i$  is fixed to be the  $i$ th data point. Furthermore, we will set  $\eta'$ , the failure probability of  $\mathcal{B}$ , to be equal to  $\eta/(mT(m, n))$  and set  $\delta'$  that is input to  $\mathcal{B}$  to be  $\delta/\gamma$ . From the guarantee of  $\mathcal{B}$  we get

that if there exists an  $i$  such that  $\sup_{z \in B_\infty^n(0, \frac{\delta}{\gamma})} (-y_i)g(x_i + z) > 0$ , with probability at least

$1 - \eta/T(m, n)$ , then  $\mathcal{B}$  will output a violated constraint of the convex program, i.e., an index  $i \in [m]$  and  $\hat{z} \in B_\infty^n(0, \delta)$  such that  $\sup_{z \in B_\infty^n(0, \delta)} (-y_i)g(x_i + \hat{z}) > 0$ . This gives us a

separating hyperplane of the form  $\text{sgn}(-y_i g(x_i + \hat{z}))$ , and the algorithm continues. Hence, we get that when the Ellipsoid algorithm terminates, with probability at least  $1 - \eta$ , it will output a polynomial  $g \in \mathcal{F}$  such that the constraints are satisfied. This means that we would have the empirical robust error  $e\hat{r}_{\delta/\gamma, S}(\text{sgn}(g)) = 0$ . Hence, by Lemma A.1, we get that

$$\text{err}_{\delta/\gamma, D}(\text{sgn}(g)) \leq 2\sqrt{\frac{2\Delta \log m}{m}} + \sqrt{\frac{\log \frac{1}{\eta}}{2m}}, \text{ where } \Delta \text{ is the VC dimension of } \mathcal{F}. \text{ Choosing } m = c \frac{\Delta + \log(1/\eta)}{\varepsilon^2}, \text{ makes } \text{err}_{\delta/\gamma, D}(\text{sgn}(g)) \leq \varepsilon. \quad \square$$

## F Finding Adversarial Examples for Two Layer Neural Networks

We now describe the polynomial optimization problems that arise for finding adversarial examples in two layer neural networks with ReLU activations. The description that follows applies to binary classification and can be easily extended to multiclass classification. The optimization problem that arises is the following: given a  $m_1 \times n$  matrix  $A$ ,  $\beta \in \mathbb{R}^{m_2}$ , and a  $m_2 \times n$  matrix  $B$  with  $B_j^T$  being the  $j$ th row of  $B$ , and  $c_1 \in \mathbb{R}^n, c_2 \in \mathbb{R}^{m_1}, c_0 \in \mathbb{R}$ . Let  $c = (c_0, c_1 c_2)$  and denote

$$\begin{aligned} \text{opt}(A, B, \beta, c) &:= \max_{z: \|z\|_\infty \leq \delta} \max_{y: \|y\|_\infty \leq 1} y^T A z + c_1^T z + c_2^T y - \|\beta + Bz\|_1 + c_0 \\ &= \max_{z: \|z\|_\infty \leq \delta} \max_{y: \|y\|_\infty \leq 1} y^T A z + c_1^T z + c_2^T y - \sum_{j=1}^{m_2} |\beta_j + B_j^T z|. \end{aligned}$$

This equation is (2). To see the connection to polynomial optimization, notice that if  $B = 0$ , then the above problem is exactly the one we considered in Section 3 in the context of degree-2 PTFs. Furthermore, if  $A = 0$ , then 2 is a linear program. However, the presence of both the terms involving  $A$  and  $B$  make 2 a challenging optimization problem. Next we discuss how the problem is related to finding adversarial examples for 2-layer neural networks. A two layer neural network with ReLU gates is given by parameters  $(v_1, v_2, W)$  and outputs  $f_1(x) = v_1^T \sigma(Wx), f_2(x) = v_2^T \sigma(Wx)$  where  $x \in \mathbb{R}^n, v_1, v_2 \in \mathbb{R}^k$  and  $W \in \mathbb{R}^{k \times n}$ . Here  $\sigma: \mathbb{R}^m \rightarrow \mathbb{R}^m$  is a co-ordinate wise non-linear operator  $\sigma(y)_i = \max\{0, y_i\}$  for each  $i \in [m]$ . The classifier corresponding to the network is  $\text{sgn}(f_1(x) - f_2(x)) = \text{sgn}((v_1 - v_2)^T \sigma(Wx)) = \text{sgn}(v^T \sigma(Wx))$ . The following proposition holds in a more general setting where there can be an extra linear term as described below.

**Proposition F.1** (Same as Proposition 6.1). *Let  $\gamma \geq 1$ . Suppose there is an algorithm that given an instance of problem (2) finds a solution  $\hat{z}, \hat{y}$  with  $\|\hat{z}\|_\infty \leq \gamma\delta, \|\hat{y}\|_\infty \leq 1$  such that  $\hat{y}^T A \hat{z} + c_1^T \hat{z} + c_2^T \hat{y} - \|\beta + B\hat{z}\|_1 + c_0 > 0$  when  $\text{opt}(A, B, \beta, c) > 0$ , then there is a polynomial time algorithm that given a classifier  $\text{sgn}(f(x))$  corresponding to a two layer neural net where  $f(x) := v^T \sigma(Wx) + (v')^T x$  and an example  $x^*$ , guarantees to either (a) find an adversarial example in the  $\ell_\infty$  ball of  $\gamma\delta$  around  $x^*$ , or (b) certify the absence of any adversarial example in the  $\ell_\infty$  ball of  $\delta$ .*

*Proof.* Let  $\ell(x^*) = \text{sgn}(f(x^*))$ . We first observe that  $\sigma(y_j) = \frac{1}{2}(|y_j| + y_j)$ , and  $\sigma(Wx)_j = \frac{1}{2}(|\langle W_j, x \rangle| + \langle W_j, x \rangle)$ , where  $W_j$  is the  $j$ th row of  $W$ . We want to find a  $\hat{z}$  with  $\|\hat{z}\|_\infty \leq \gamma\delta$ , such that  $(-\ell(x^*))f(x^* + \hat{z}) > 0$ , or certify that there is no such  $\hat{z}$  with  $\|\hat{z}\|_\infty \leq \delta$ .

Let  $S_+ = \{j \in [k] : -\ell(x^*)v_j \geq 0\}$  and  $S_- = [k] \setminus S_+$  and let  $k_1 = |S_+|$ . We now split the rows of  $W$  into two ( $A$  and  $B$ ) as follows: for every  $j \in S_+$ , define the row  $A_j := \frac{1}{2}|v_j|W_j$ ;

otherwise let  $B_j := \frac{1}{2}|v_j|W_j$ .

$$\begin{aligned} -\ell(x^*)f(x^* + z) &= \frac{1}{2} \sum_{j \in S_+} |v_j| |\langle W_j, x^* + z \rangle| + \frac{1}{2} \langle v^T W, x^* + z \rangle - \frac{1}{2} \sum_{j \in S_-} |v_j| |\langle W_j, x^* + z \rangle| \\ &= \max_{y \in \{-1, 1\}^{k_1}} \sum_{j \in S_+} y_j \langle A_j, x^* + z \rangle - \sum_{j \in S_-} |\langle B_j, x^* + z \rangle| + c_1^T z + c_0, \end{aligned}$$

where  $c_1^T = \frac{1}{2}v^T W + (v')^T$  and  $c_0 = \frac{1}{2}v^T W x^*$  are constants. Since the dependence on  $y$  is linear we also get by substituting  $c_2 := Ax^*$ ,  $\beta := Bx^*$ ,

$$\max_{\|z\|_\infty \leq \delta} (-\ell(x^*))f(x^* + z) = \max_{\|z\|_\infty \leq \delta} \max_{y: \|y\|_\infty \leq 1} \sum_{j \in S_+} y_j \langle A_j, z \rangle + c_2^T y + c_1^T z - \sum_{j \in S_-} |\beta_j + \langle B_j, z \rangle| + c_0,$$

as required. Now the proposition follows from the same argument as in Proposition 3.1.  $\square$

## G Computational Hardness of Learning Approximately Optimally Robust Classifiers.

In this section we show that assuming  $NP$  does not have randomized polynomial time algorithms, no polynomial time algorithm  $\gamma$ -approximately robust learns degree-2 PTFs for  $\gamma = O(\sqrt{\eta_{approx}})$ , where  $\eta_{approx}$  denotes the hardness of approximation factor for the QP problem. To recall, in *Quadratic Programming (QP)* we are given a polynomial  $p(x) = \sum_{i < j} a_{ij}x_i x_j$ , and the goal is to evaluate  $\max_{x \in \{-1, 1\}^n} p(x)$ . We will represent the polynomial  $p(x) = x^T A x$  where  $A$  is a symmetric matrix with zeros on the diagonal, and  $A_{ij} = A_{ji} = a_{ij}/2$ . Formally, the  $NP$ -hard problem  $QP$  [3, 14] is the following: given  $\beta > 0$  and a polynomial  $p(x) = x^T A x$  distinguish whether

**No Case :** there exists an assignment  $x^* \in \{-1, 1\}^n$  such that  $p(x^*) > \beta \eta_{approx}$ ,

**Yes Case :** for every assignment  $x \in \{-1, 1\}^n$ ,  $p(x) < \beta$ .

We prove that there exists a  $\delta > 0$  and a set of  $N = \text{poly}(n)$  points such that it is hard to distinguish whether there exists a degree-2 PTF that is  $\delta$  robust at all the points or that no degree-2 PTF is  $\eta\delta$  robust for  $\eta = \Omega(1/\sqrt{\eta_{approx}})$ .

**Theorem G.1.** [Hardness] *There exists  $\delta > 0$ , such that assuming  $NP \neq RP$  there is no polynomial time algorithm that given a set of  $N = O(n^2)$  labeled points  $\{(x^{(1)}, y^{(1)}), \dots, (x^{(N)}, y^{(N)})\}$  with  $(x^{(j)}, y^{(j)}) \in \mathbb{R}^{n+1} \times \{-1, 1\}$  for all  $j \in [N]$  can distinguish between the following two cases*

**YES Case:** *There exists a degree-2 PTF that has  $\delta$ -robust empirical error of 0 on these  $N$  points.*

**NO Case:** *No degree-2 PTF is  $\eta\delta$ -robust on these points for  $\eta = \Omega(1/\sqrt{\eta_{approx}})$ .*

The above theorem immediately implies the following result about hardness of approximately optimal robust learning of degree-2 PTFs.

**Corollary G.2** (Same as Theorem 5.1). *There exists  $\delta, \varepsilon > 0$ , such that assuming  $NP \neq RP$  there is no algorithm that given a set of  $N = \text{poly}(n, \frac{1}{\varepsilon})$  samples from a distribution  $D$  over  $\mathbb{R}^n \times \{-1, +1\}$ , runs in time  $\text{poly}(N)$  and distinguishes between the following two cases for any  $\delta' = o(\sqrt{\eta_{approx}}\delta)$ :*

- YES: *There exists a degree-2 PTF that has  $\delta$ -robust error of 0 w.r.t.  $D$ .*
- NO: *There exists no degree-2 PTF that has  $\delta'$ -robust error at most  $\varepsilon$  w.r.t.  $D$ .*

Here  $\eta_{approx}$  is the hardness of approximation factor of the QP problem.

The above corollary proves that any polynomial time algorithm that always outputs a robust classifier (or declares failure if it does not find one) will have to incur an extra factor of  $\Omega(\sqrt{\eta_{approx}})$  in the robustness parameter  $\delta$ . Our upper bound in Section 4 on the other

hand matches this bound. The corollary above follows from Theorem G.1 and the standard fact used in establishing learning theoretic hardness [20], namely if there were a robust learning algorithm for every distribution and  $\varepsilon > 0$ , the one could use it on the uniform distribution over the instance from Theorem G.1 with  $\varepsilon = \frac{1}{2N}$  to determine whether there exists a degree-2 PTF that has  $\delta$ -robust empirical error of 0 on the points in the instance. Hence our main goal is to prove Theorem G.1. In order to get hardness of approximation, we need to pick the set of points carefully. Our set of points will have the property that in the YES case of the QP instance, the polynomial  $x^T Ax - z$  will be  $\delta$  robust at all the points. Furthermore, the points will enforce the property that any other degree-2 PTF that classifies the points correctly will have to be very close to  $x^T Ax - z$  in terms of the parameters. This will help use rule out the existence of an  $\eta\delta$  robust classifier in the NO case, since if one exists, it must be close to  $x^T Ax - z$ , thereby implying an upper bound on the value of  $x^T Ax$  around the neighborhood of zero. The key lemma used in our construction is stated below.

**Lemma G.3.** *Let  $p(x, z) = x^T Ax - z$  be a given polynomial where  $A$  is a symmetric matrix with zeros on the diagonal. For any  $\varepsilon, \delta < 1/10$ , consider the labeled set  $S = S_1 \cup S_2 \cup S_3 \cup S_4 \cup S_5$  where,*

$$S_1 = \{((\mathbf{0}, 1), -1), ((\mathbf{0}, -1), +1), ((\mathbf{0}, \tau'), -1), ((\mathbf{0}, -\tau'), +1), ((\mathbf{0}, 2\delta), -1), ((\mathbf{0}, -2\delta), +1)\},$$

$$S_2 = \{((\mathbf{e}_i, \gamma), -1), ((\mathbf{e}_i, -\gamma), +1), ((-\mathbf{e}_i, \gamma), -1), ((-\mathbf{e}_i, -\gamma), +1)\}, \forall i \in [n],$$

$$S_3 = \{((\mathbf{e}_{i,j}, 2), -1), ((\mathbf{e}_{-i,j}, 2), -1), ((\mathbf{e}_{i,-j}, 2), -1), ((\mathbf{e}_{-i,-j}, 2), -1)\}, \forall i \neq j \in [n],$$

$$S_4 = \{((2\mathbf{e}_{i,j}, 1), \text{sgn}(a_{i,j})), ((2\mathbf{e}_{-i,j}, 1), -\text{sgn}(a_{i,j})), ((2\mathbf{e}_{i,-j}, 1), -\text{sgn}(a_{i,j})), ((2\mathbf{e}_{-i,-j}, 1), \text{sgn}(a_{i,j}))\}, \forall i \neq j \in [n],$$

and

$$S_5 = \{((\mathbf{e}_{i,j}, -2), +1), ((\mathbf{e}_{-i,j}, -2), +1), ((\mathbf{e}_{i,-j}, -2), +1), ((\mathbf{e}_{-i,-j}, -2), +1)\}, \forall i \neq j \in [n],$$

Here  $\mathbf{e}_i$  is the vector  $(0, 0, \dots, \tau, 0, \dots, 0)$  and  $\mathbf{e}_{i,j}$  is the vector  $(0, 0, \dots, \frac{1}{\sqrt{2(\varepsilon + |a_{i,j}|)}}, 0, \dots, \frac{1}{\sqrt{2(\varepsilon + |a_{i,j}|)}}, 0, \dots, 0)$ . For every general degree 2 polynomial  $q'(x, z)$  with the coefficient of  $z = c_z$ , such that  $\text{sgn}(q')$  has zero error on  $S$ , we must have  $c_z \neq 0$ . Moreover, let  $q(x, z) = \frac{1}{-c_z} q'(x, z) = x^T A' x + c_1^T x + c_2 z^2 - z + c_4 + \sum_i \beta_i z x_i$ , where  $A'$  be a symmetric matrix. Then we must have that

$$\max(|c_2|, \|\beta\|_\infty, |a'_{i,i}|) \leq \varepsilon,$$

$$|c_4| \leq 4\delta,$$

$$|c_{1,i}| \leq \min_{j \neq i} 8\delta \sqrt{\varepsilon + |a_{i,j}|},$$

and

$$\frac{1}{4} - \delta - \frac{\varepsilon}{4} \leq \max\left(\frac{|a'_{i,j}|}{\varepsilon + |a_{i,j}|}\right) \leq 2 + 4\delta + \varepsilon$$

provided  $\tau' = \Omega(\frac{n^2}{\varepsilon}) \max(1, 1/(\varepsilon + \min_{i \neq j} |a_{i,j}|))$ ,  $\tau = \Omega(\frac{n}{\varepsilon}) \max(1, 1/(\varepsilon + \min_{i \neq j} |a_{i,j}|))$ ,  $\gamma = 4n\tau$ .

We first prove Theorem G.1 assuming the lemma above and finally end the section with the proof of the lemma.

*Proof of Theorem G.1.* Given an  $n \times n$  symmetric matrix  $A$  with zeros on diagonals and given  $s > 100$ , we assume that the following cases are hard to distinguish for some  $\eta_{approx} > 1$ ,

**YES Case:**  $\max_{x \in \{-1, 1\}^n} x^T Ax < s$ .

**NO Case:**  $\max_{x \in \{-1, 1\}^n} x^T Ax > s\eta_{approx}$ . The reduction from the instance of the QP problem is sketched below. Next we establish completeness and soundness of the reduction.

1. Scale the entries of  $A$  such that each non zero entry is greater than 10. Scale  $s$  by the same factor. Set  $\delta = 1/s$  and  $\varepsilon = 200/n^2$ .
2. Generate the labeled point set  $S$  in  $\mathbb{R}^{n+1}$  as specified in Theorem ?? with  $\tau' = \Omega(\frac{n^2}{\varepsilon}) \max(1, 1/(\varepsilon + \min_{i \neq j} |a_{i,j}|))$ ,  $\tau = \Omega(\frac{n}{\varepsilon}) \max(1, 1/(\varepsilon + \min_{i \neq j} |a_{i,j}|))$ ,  $\gamma = 4n\tau$ .

Figure 6: Reduction from the QP problem.

**NO Case:**

**Claim G.4.** *There does not exist an  $\eta\delta$ -robust degree-2 polynomial on  $S$  for  $\eta = \Omega(1/\sqrt{\eta_{approx}})$ .*

*Proof.* Proof by contradiction. Let  $q(x, z) = x^T A' x + c_1^T x + c_2 z^2 - z + c_4 + \sum_i \beta_i z x_i^2$  be an  $\eta\delta$ -robust polynomial on  $S$ . The fact that  $q$  is correct on  $(\mathbf{0}, 2\delta)$  gives us

$$4c_2\delta^2 - 2\delta + c_4 < 0 \quad (11)$$

Furthermore, the fact that  $q$  is  $\eta\delta$ -robust on  $(\mathbf{0}, 2\delta)$  gives us that

$$\max_{x \in B_\infty^n(0, \eta\delta), z \in (2\delta - \eta\delta, 2\delta + \eta\delta)} q(x, z) < |4c_2\delta^2 - 2\delta + c_4| \quad (12)$$

From Lemma G.3 this implies that

$$\max_{x \in B_\infty^n(0, \eta\delta)} x^T A' x < |4c_2\delta^2 - 2\delta + c_4| + (2\delta + \eta\delta) + 12\delta + \varepsilon(2\delta + \eta\delta)^2 + n\varepsilon\eta\delta(2\delta + \eta\delta) \quad (13)$$

Substituting the value of  $\varepsilon$  we get that

$$\max_{x \in B_\infty^n(0, \eta\delta)} x^T A' x < 20\delta. \quad (14)$$

Again using Lemma G.3 we get that

$$\max_{x \in B_\infty^n(0, \delta)} x^T A x < \frac{50\delta}{\eta^2}. \quad (15)$$

But since we are in the NO case we also know that

$$\max_{x \in B_\infty^n(0, \delta)} x^T A x > \delta^2 s \eta_{approx} = \delta \eta_{approx}. \quad (16)$$

This contradicts the fact that  $\eta = \Omega(1/\sqrt{\eta_{approx}})$ .  $\square$

**YES Case:**

**Claim G.5.** *The polynomial  $p(x, z) = x^T A x - z$  is  $\delta$ -robust on  $S$ .*

*Proof.* It is easy to check that  $\text{sgn}(x^T A x - z)$  classifies all of  $S$  correctly.

**Robustness at  $((\mathbf{0}, 2\delta), -1)$ .** Follows from the fact that we are in the YES case and hence  $\max_{x \in B_\infty^n(0, \delta)} x^T A x < \delta^2 s = \delta$ .

**Robustness at  $((\mathbf{0}, 1), -1), ((\mathbf{0}, \tau'), -1), ((\mathbf{0}, -1), +1), ((\mathbf{0}, -\tau'), +1)$ .** Follows from the fact that we are in the YES case and hence  $\max_{x \in B_\infty^n(0, \delta)} x^T A x < \delta^2 s = 1/s < 1/100$  and that  $\tau' > n/(20\delta) > 5n$ .

**Robustness at  $((\mathbf{0}, 2\delta), -1), ((\mathbf{0}, -2\delta), +1)$ .** Follows from the fact that we are in the YES case and hence  $\max_{x \in B_\infty^n(0, \delta)} x^T A x < \delta^2 s = \delta$  and that  $\varepsilon n/10 = 20\delta$ .

**Robustness at  $((\mathbf{e}_i, \gamma), -1), ((\mathbf{e}_i, -\gamma), +1), ((-\mathbf{e}_i, \gamma), -1), ((-\mathbf{e}_i, -\gamma), +1)$ .** Let's argue robustness at  $((\mathbf{e}_i, \gamma), -1)$  and the other calculations are similar. The maximum value of  $x^T A x$  in a  $\delta$ -ball around  $\mathbf{e}_i$  is at most

$$(\tau + \delta)\delta \sum_j |a_{i,j}| + \delta^2 s.$$

<sup>2</sup>Can always scale  $q$  to get it into this form.

Hence to establish robustness we need that

$$(\tau + \delta)\delta \sum_j |a_{i,j}| + \delta^2 s \leq \gamma - \delta. \quad (17)$$

Substituting the value of  $\delta$  and noticing that  $\gamma, \tau$  are much larger than  $\delta = 1/s < 1/100$  we get that it is enough for the following to hold

$$2\tau\delta \sum_j |a_{i,j}| \leq \frac{\gamma}{2}. \quad (18)$$

In other words we need that

$$\frac{\gamma}{\tau} \geq 4\delta \sum_j |a_{i,j}| \quad (19)$$

Substituting the values of  $\gamma, \tau$  we get that

$$n \geq \delta \sum_j |a_{i,j}| \quad (20)$$

This is true since  $\delta = 1/s$  and the fact that  $s \geq \frac{1}{n} \sum_{i,j} |a_{i,j}| > \frac{1}{n} \sum_j |a_{i,j}|$  where the first inequality is from [9].

**Robustness at  $((\mathbf{e}_{i,j}, 2), -1), ((\mathbf{e}_{-i,j}, 2), -1), ((\mathbf{e}_{i,-j}, 2), -1), ((\mathbf{e}_{-i,-j}, 2), -1)$ .** Let's argue robustness at  $((\mathbf{e}_{i,j}, 2), -1)$  and the other calculations are similar. The maximum value of  $x^T Ax$  in a  $\delta$ -ball around  $\mathbf{e}_{i,j}$  is at most

$$\frac{2\delta \max_i \sum_j |a_{i,j}|}{\sqrt{2(\varepsilon + |a_{i,j}|)}} + \delta^2 s + 1$$

Hence to establish robustness we need that

$$\frac{2\delta \max_i \sum_j |a_{i,j}|}{\sqrt{2(\varepsilon + |a_{i,j}|)}} + \delta^2 s + 1 \leq 2 - \delta. \quad (21)$$

Noticing that  $\delta = 1/s$  and much smaller than  $1/100$ , we get that it is enough for the following to hold

$$\frac{\delta \max_i \sum_j |a_{i,j}|}{\sqrt{2(\varepsilon + |a_{i,j}|)}} \leq \frac{1}{4}. \quad (22)$$

This is again true since  $\delta = 1/s$  and by our assumption  $|a_{i,j}| \geq 4$  for non-zero entries of  $A$ .  $\square$

**Robustness at  $((2\mathbf{e}_{i,j}, 1), \text{sgn}(a_{i,j})), ((2\mathbf{e}_{-i,j}, 1), -\text{sgn}(a_{i,j})), ((2\mathbf{e}_{i,-j}, 1), -\text{sgn}(a_{i,j})), ((2\mathbf{e}_{-i,-j}, 1), \text{sgn}(a_{i,j}))$ .** We'll argue robustness at  $((2\mathbf{e}_{i,j}, 1), +1)$  and the other calculations are similar. Also for simplicity, assume  $\text{sgn}(a_{i,j}) > 0$ . The other case is similar. The minimum value of  $x^T Ax$  in a  $\delta$ -ball around  $\mathbf{e}_{i,j}$  is at least

$$2 - \frac{2\delta \max_i \sum_j |a_{i,j}|}{\sqrt{2(\varepsilon + |a_{i,j}|)}} - \delta^2 s$$

So for robustness, we need

$$2 - \frac{2\delta \max_i \sum_j |a_{i,j}|}{\sqrt{2(\varepsilon + |a_{i,j}|)}} - \delta^2 s > 1 + \delta$$

This is true since we have

$$\frac{\delta \max_i \sum_j |a_{i,j}|}{\sqrt{2(\varepsilon + |a_{i,j}|)}} \leq \frac{1}{4}.$$

$\square$

*Proof of Lemma G.3.* First we prove that if  $q'(x, z)$  has zero error on  $S$  then  $c_z$  must be non zero. Then it is clear that if  $q'(x, z)$  has zero error on  $S$ , then so does  $q(x, z)$ . Consider the case when  $c_z = 0$ . Now  $q'(x, z)$  classifies  $S_1$  correctly. More specifically, it classifies the two points  $((\mathbf{0}, 1), -1)$  and  $((\mathbf{0}, -1), 1)$  correctly. This gives us the following equations

$$c_2 + c_4 < 0$$

$$c_2 + c_4 > 0$$

and hence we get a contradiction. Moving on to the main part of the proof about the coefficients of  $q(x, z)$ , the constraints at  $(\mathbf{0}, 1), (\mathbf{0}, -1), (\mathbf{0}, \tau'), (\mathbf{0}, -\tau')$  give us

$$c_2 - 1 + c_4 < 0 \quad (23)$$

$$c_2 + 1 + c_4 > 0 \quad (24)$$

$$\tau'^2 c_2 - \tau' + c_4 < 0 \quad (25)$$

$$\tau'^2 c_2 + \tau' + c_4 > 0 \quad (26)$$

From (23) and (24) we get that

$$-1 < c_2 + c_4 < 1 \quad (27)$$

Similarly, from (25) and (26) we get that

$$-\tau' < \tau'^2 c_2 + c_4 < \tau' \quad (28)$$

This implies that  $|c_2| < 1/(\tau' - 1) < \varepsilon/10$  for  $\tau' = \Omega(1/\varepsilon)$ .

The constraints at  $((\mathbf{0}, 2\delta), -1), ((\mathbf{0}, -2\delta), 1)$  gives us that

$$4c_2\delta^2 - 2\delta + c_4 < 0$$

$$4c_2\delta^2 + 2\delta + c_4 > 0$$

From the above equations we get that

$$|c_4| \leq c_2(2\delta)^2 + 2\delta < 4\delta. \quad (29)$$

The constraints at  $(\mathbf{e}_i, \gamma), (-\mathbf{e}_i, \gamma), (\mathbf{e}_i, -\gamma), (-\mathbf{e}_i, -\gamma)$  give us

$$\tau^2 a'_{i,i} + \tau c_{1,i} + c_2 \gamma^2 - \gamma + c_4 + \tau \gamma \beta_i < 0 \quad (30)$$

$$\tau^2 a'_{i,i} - \tau c_{1,i} + c_2 \gamma^2 - \gamma + c_4 - \tau \gamma \beta_i < 0 \quad (31)$$

$$\tau^2 a'_{i,i} + \tau c_{1,i} + c_2 \gamma^2 + \gamma + c_4 - \tau \gamma \beta_i > 0 \quad (32)$$

$$\tau^2 a'_{i,i} - \tau c_{1,i} + c_2 \gamma^2 + \gamma + c_4 + \tau \gamma \beta_i > 0 \quad (33)$$

From (30) and (33) we get that

$$\tau c_{1,i} < \gamma \quad (34)$$

Similarly, from (31) and (32) we get that

$$\tau c_{1,i} > -\gamma \quad (35)$$

Plugging back into the equations above we get that

$$-(4\delta + 2\gamma + \frac{\gamma^2}{\tau' - 1}) < \tau^2 a'_{i,i} + \tau \gamma \beta_i < (4\delta + 2\gamma + \frac{\gamma^2}{\tau' - 1}) \quad (36)$$

and

$$-(4\delta + 2\gamma + \frac{\gamma^2}{\tau' - 1}) < \tau^2 a'_{i,i} - \tau \gamma \beta_i < (4\delta + 2\gamma + \frac{\gamma^2}{\tau' - 1}) \quad (37)$$

This implies that

$$|a'_{i,i}| \leq \frac{1}{\tau^2} (4\delta + 2\gamma + \frac{\gamma^2}{\tau' - 1}) \leq \varepsilon/10$$

for  $\tau' = \Omega(\frac{n^2}{\varepsilon}) \max(1, 1/\min_{i,j} |a_{i,j}|)$ ,  $\tau = \Omega(\frac{n}{\varepsilon}) \max(1, 1/\min_{i,j} |a_{i,j}|)$ ,  $\gamma = 4n\tau$ . We also get that

$$|\beta_i| \leq \frac{1}{\tau\gamma} (4\delta + 2\gamma + \frac{\gamma^2}{\tau' - 1}) \leq \varepsilon/10$$

for  $\tau' = \Omega(\frac{n^2}{\varepsilon}) \max(1, 1/\min_{i,j} |a_{i,j}|)$ ,  $\tau = \Omega(\frac{n}{\varepsilon}) \max(1, 1/\min_{i,j} |a_{i,j}|)$ ,  $\gamma = 4n\tau$ .

The constraints at  $(\mathbf{e}_{i,j}, 2)$ ,  $(\mathbf{e}_{-i,j}, 2)$ ,  $(\mathbf{e}_{i,-j}, 2)$ ,  $(\mathbf{e}_{-i,-j}, 2)$  give us

$$\frac{a'_{i,i}}{2\tilde{a}_{i,j}} + \frac{a'_{j,j}}{2\tilde{a}_{i,j}} + \frac{a'_{i,j}}{\tilde{a}_{i,j}} + \frac{c_{1,i}}{\sqrt{2\tilde{a}_{i,j}}} + \frac{c_{1,j}}{\sqrt{2\tilde{a}_{i,j}}} + 4c_2 - 2 + c_4 + \frac{2\beta_i}{\sqrt{2\tilde{a}_{i,j}}} + \frac{2\beta_j}{\sqrt{2\tilde{a}_{i,j}}} < 0 \quad (38)$$

$$\frac{a'_{i,i}}{2\tilde{a}_{i,j}} + \frac{a'_{j,j}}{2\tilde{a}_{i,j}} - \frac{a'_{i,j}}{\tilde{a}_{i,j}} - \frac{c_{1,i}}{\sqrt{2\tilde{a}_{i,j}}} + \frac{c_{1,j}}{\sqrt{2\tilde{a}_{i,j}}} + 4c_2 - 2 + c_4 - \frac{2\beta_i}{\sqrt{2\tilde{a}_{i,j}}} + \frac{2\beta_j}{\sqrt{2\tilde{a}_{i,j}}} < 0 \quad (39)$$

$$\frac{a'_{i,i}}{2\tilde{a}_{i,j}} + \frac{a'_{j,j}}{2\tilde{a}_{i,j}} - \frac{a'_{i,j}}{\tilde{a}_{i,j}} + \frac{c_{1,i}}{\sqrt{2\tilde{a}_{i,j}}} - \frac{c_{1,j}}{\sqrt{2\tilde{a}_{i,j}}} + 4c_2 - 2 + c_4 + \frac{2\beta_i}{\sqrt{2\tilde{a}_{i,j}}} - \frac{2\beta_j}{\sqrt{2\tilde{a}_{i,j}}} < 0 \quad (40)$$

$$\frac{a'_{i,i}}{2\tilde{a}_{i,j}} + \frac{a'_{j,j}}{2\tilde{a}_{i,j}} + \frac{a'_{i,j}}{\tilde{a}_{i,j}} - \frac{c_{1,i}}{\sqrt{2\tilde{a}_{i,j}}} - \frac{c_{1,j}}{\sqrt{2\tilde{a}_{i,j}}} + 4c_2 - 2 + c_4 - \frac{2\beta_i}{\sqrt{2\tilde{a}_{i,j}}} - \frac{2\beta_j}{\sqrt{2\tilde{a}_{i,j}}} < 0 \quad (41)$$

where  $\tilde{a}_{i,j} = \varepsilon + |a_{i,j}|$ . Combining (38) and (41) we get

$$\frac{a'_{i,i}}{2\tilde{a}_{i,j}} + \frac{a'_{j,j}}{2\tilde{a}_{i,j}} + \frac{a'_{i,j}}{\tilde{a}_{i,j}} + 4c_2 - 2 + c_4 < 0 \quad (42)$$

From this we get that

$$\frac{a'_{i,j}}{\tilde{a}_{i,j}} < 2 + 4\delta + 4\frac{\varepsilon}{10} + \frac{4\delta + 2\gamma + \frac{\gamma^2}{\tau' - 1}}{\tau^2 \min_{i,j} |a_{i,j}|} < 2 + 4\delta + \varepsilon \quad (43)$$

for large enough  $\tau$ . Similarly, combining (39) and (40) we get

$$\frac{a'_{i,i}}{2\tilde{a}_{i,j}} + \frac{a'_{j,j}}{2\tilde{a}_{i,j}} - \frac{a'_{i,j}}{\tilde{a}_{i,j}} + 4c_2 - 2 + c_4 < 0 \quad (44)$$

From this we get that

$$\frac{a'_{i,j}}{\tilde{a}_{i,j}} > -2 - 4\delta - \varepsilon. \quad (45)$$

The constraints at  $(\mathbf{e}_{i,j}, -2)$ ,  $(\mathbf{e}_{-i,j}, -2)$ ,  $(\mathbf{e}_{i,-j}, -2)$ ,  $(\mathbf{e}_{-i,-j}, -2)$  give us

$$\frac{a'_{i,i}}{2\tilde{a}_{i,j}} + \frac{a'_{j,j}}{2\tilde{a}_{i,j}} + \frac{a'_{i,j}}{\tilde{a}_{i,j}} + \frac{c_{1,i}}{\sqrt{2\tilde{a}_{i,j}}} + \frac{c_{1,j}}{\sqrt{2\tilde{a}_{i,j}}} + 4c_2 + 2 + c_4 + \frac{2\beta_i}{\sqrt{2\tilde{a}_{i,j}}} + \frac{2\beta_j}{\sqrt{2\tilde{a}_{i,j}}} > 0 \quad (46)$$

$$\frac{a'_{i,i}}{2\tilde{a}_{i,j}} + \frac{a'_{j,j}}{2\tilde{a}_{i,j}} - \frac{a'_{i,j}}{\tilde{a}_{i,j}} - \frac{c_{1,i}}{\sqrt{2\tilde{a}_{i,j}}} + \frac{c_{1,j}}{\sqrt{2\tilde{a}_{i,j}}} + 4c_2 + 2 + c_4 - \frac{2\beta_i}{\sqrt{2\tilde{a}_{i,j}}} + \frac{2\beta_j}{\sqrt{2\tilde{a}_{i,j}}} > 0 \quad (47)$$

$$\frac{a'_{i,i}}{2\tilde{a}_{i,j}} + \frac{a'_{j,j}}{2\tilde{a}_{i,j}} - \frac{a'_{i,j}}{\tilde{a}_{i,j}} + \frac{c_{1,i}}{\sqrt{2\tilde{a}_{i,j}}} - \frac{c_{1,j}}{\sqrt{2\tilde{a}_{i,j}}} + 4c_2 + 2 + c_4 + \frac{2\beta_i}{\sqrt{2\tilde{a}_{i,j}}} - \frac{2\beta_j}{\sqrt{2\tilde{a}_{i,j}}} > 0 \quad (48)$$

$$\frac{a'_{i,i}}{2\tilde{a}_{i,j}} + \frac{a'_{j,j}}{2\tilde{a}_{i,j}} + \frac{a'_{i,j}}{\tilde{a}_{i,j}} - \frac{c_{1,i}}{\sqrt{2\tilde{a}_{i,j}}} - \frac{c_{1,j}}{\sqrt{2\tilde{a}_{i,j}}} + 4c_2 + 2 + c_4 - \frac{2\beta_i}{\sqrt{2\tilde{a}_{i,j}}} - \frac{2\beta_j}{\sqrt{2\tilde{a}_{i,j}}} > 0 \quad (49)$$

Combining (38) and (47) we get

$$\frac{a'_{i,j}}{\tilde{a}_{i,j}} + \frac{c_{1,i}}{\sqrt{2\tilde{a}_{i,j}}} - 2 + \frac{2\beta_i}{\sqrt{2\tilde{a}_{i,j}}} < 0 \quad (50)$$

From this we get that

$$c_{1,i} < (4\delta + \varepsilon)\sqrt{2\tilde{a}_{i,j}} \quad (51)$$

for large enough  $\tau$ . Similarly, from (48) and (40) we get

$$c_{1,i} > -(4\delta + \varepsilon)\sqrt{2\tilde{a}_{i,j}}. \quad (52)$$

Finally, the constraints at  $(2\mathbf{e}_{i,j}, 1), (2\mathbf{e}_{-i,j}, 1), (2\mathbf{e}_{i,-j}, 1), (2\mathbf{e}_{-i,-j}, 1)$  give us

$$2\frac{a'_{i,i}}{\tilde{a}_{i,j}} + 2\frac{a'_{j,j}}{\tilde{a}_{i,j}} + 4\frac{a'_{i,j}}{\tilde{a}_{i,j}} + \frac{2c_{1,i}}{\sqrt{2\tilde{a}_{i,j}}} + \frac{2c_{1,j}}{\sqrt{2\tilde{a}_{i,j}}} + c_2 - 1 + c_4 + \frac{4\beta_i}{\sqrt{2\tilde{a}_{i,j}}} + \frac{4\beta_j}{\sqrt{2\tilde{a}_{i,j}}} > 0 \quad (53)$$

$$2\frac{a'_{i,i}}{\tilde{a}_{i,j}} + 2\frac{a'_{j,j}}{\tilde{a}_{i,j}} - 4\frac{a'_{i,j}}{\tilde{a}_{i,j}} - \frac{2c_{1,i}}{\sqrt{2\tilde{a}_{i,j}}} + \frac{2c_{1,j}}{\sqrt{2\tilde{a}_{i,j}}} + c_2 - 1 + c_4 - \frac{4\beta_i}{\sqrt{2\tilde{a}_{i,j}}} + \frac{4\beta_j}{\sqrt{2\tilde{a}_{i,j}}} < 0 \quad (54)$$

$$2\frac{a'_{i,i}}{\tilde{a}_{i,j}} + 2\frac{a'_{j,j}}{\tilde{a}_{i,j}} - 4\frac{a'_{i,j}}{\tilde{a}_{i,j}} + \frac{2c_{1,i}}{\sqrt{2\tilde{a}_{i,j}}} - \frac{2c_{1,j}}{\sqrt{2\tilde{a}_{i,j}}} + c_2 - 1 + c_4 + \frac{4\beta_i}{\sqrt{2\tilde{a}_{i,j}}} - \frac{4\beta_j}{\sqrt{2\tilde{a}_{i,j}}} < 0 \quad (55)$$

$$2\frac{a'_{i,i}}{\tilde{a}_{i,j}} + 2\frac{a'_{j,j}}{\tilde{a}_{i,j}} + 4\frac{a'_{i,j}}{\tilde{a}_{i,j}} - \frac{2c_{1,i}}{\sqrt{2\tilde{a}_{i,j}}} - \frac{2c_{1,j}}{\sqrt{2\tilde{a}_{i,j}}} + c_2 - 1 + c_4 - \frac{4\beta_i}{\sqrt{2\tilde{a}_{i,j}}} - \frac{4\beta_j}{\sqrt{2\tilde{a}_{i,j}}} > 0 \quad (56)$$

Combining (53) and (56) we get

$$2\frac{a'_{i,i}}{\tilde{a}_{i,j}} + 2\frac{a'_{j,j}}{\tilde{a}_{i,j}} + 4\frac{a'_{i,j}}{\tilde{a}_{i,j}} + c_2 - 1 + c_4 > 0 \quad (57)$$

From this we get that

$$\frac{a'_{i,j}}{\tilde{a}_{i,j}} > \frac{1}{4} - \delta - \frac{\varepsilon}{4} \quad (58)$$

for large enough  $\tau$ . Similarly, combining (54) and (55) we get

$$2\frac{a'_{i,i}}{\tilde{a}_{i,j}} + 2\frac{a'_{j,j}}{\tilde{a}_{i,j}} - 4\frac{a'_{i,j}}{\tilde{a}_{i,j}} + c_2 - 1 + c_4 < 0 \quad (59)$$

From this we get that

$$\frac{a'_{i,j}}{\tilde{a}_{i,j}} > -\frac{1}{4} - \delta - \frac{\varepsilon}{4} \quad (60)$$

for large enough  $\tau$ . □

## G.1 A Lower Bound for Weak Robust Learning

In this section we prove a robust lower bound that rules out the possibility of weak robust learning with  $\gamma = 1$ . This hardness result allows the algorithm to output a robust classifier that makes errors on constant fraction of the points! Hence, even when there is a degree-2 PTF that has  $\delta$  robust error of 0, it is computationally hard to output a degree-2 PTF that has  $\delta$ -robust error of  $\varepsilon \leq \frac{1}{4}$ .

**Theorem G.6.** *[Stronger Distributional Hardness] For every  $\delta > 0$  and  $\varepsilon \in (0, \frac{1}{4})$ , assuming  $NP \neq RP$  there is no polynomial time algorithm that given a set of  $N = \text{poly}(n, \frac{1}{\varepsilon})$  samples from a distribution  $D$  over  $\mathbb{R}^n \times \{-1, +1\}$  can distinguish between the following two cases:*

- YES: There exists a degree-2 PTF that has  $\delta$ -robust error of 0 w.r.t.  $D$ .
- NO: There exists no degree-2 PTF that has  $\delta$ -robust error at most  $\varepsilon$  w.r.t.  $D$ .

The proof of the above theorem uses non-distributional hardness in Theorem G.16. But to begin with we first prove an alternate NP hardness result. Although weaker than the hardness result of the previous section, this will help us prove the more robust bound. More formally, we will prove that

**Theorem G.7.** [Hardness] For every  $\delta > 0$ , assuming  $NP \neq RP$  there is no polynomial time algorithm that given a set of  $N = O(n^2)$  labeled points  $\{(x^{(1)}, y^{(1)}), \dots, (x^{(N)}, y^{(N)})\}$  with  $(x^{(j)}, y^{(j)}) \in \mathbb{R}^{n+1} \times \{-1, 1\}$  for all  $j \in [N]$  can determine whether there exists a degree-2 PTF that has  $\delta$ -robust empirical error of 0 on these  $N$  points.

The above theorem immediately implies the following result about hardness of optimal robust learning of degree-2 PTFs.

**Corollary G.8.** [Distributional Hardness] For every  $\delta > 0$ , there exists an  $\varepsilon > 0$  such that assuming  $NP \neq RP$  there is no algorithm that given a set of  $N = \text{poly}(n, \frac{1}{\varepsilon})$  samples from a distribution  $D$  over  $\mathbb{R}^n \times \{-1, +1\}$ , runs in time  $\text{poly}(N)$  and distinguishes between the following two cases:

- YES: There exists a degree-2 PTF that has  $\delta$ -robust error of 0 w.r.t.  $D$ .
- NO: There exists no degree-2 PTF that has  $\delta$ -robust error at most  $\varepsilon$  w.r.t.  $D$ .

We again reduce from the QP problem (Problem  $\mathcal{QP}$ ) which is known to be NP hard. The reduction is sketched below.

1. Let  $p(x) := x^T A x$  be the polynomial given by Problem  $\mathcal{QP}$ , and let  $\beta, \delta$  be the given parameters. Set  $\alpha := \delta^2 \beta + \delta, \rho := c_3 \delta n^{3/2} m$ , for some sufficiently large constant  $c_3 \geq 1$ .
2. Using  $A$  we generate  $m$  points  $(x^{(j)}, z^{(j)}) \in \mathbb{R}^{n+1}$  as follows. Sample point  $x^{(j)}$  from  $\mathbb{N}(0, \rho^2)^n$ , then set  $z^{(j)} = p(x^{(j)}) = (x^{(j)})^T A x^{(j)}$  for each  $j \in [m]$ .
3. Define  $s^{(j)} = \text{sgn}(\nabla p(x^{(j)}))$  where the  $\text{sgn}(x) \in \{-1, 1\}^n$  refers to a vector with entry-wise signs, and  $\nabla p$  stands for the gradient of  $p$  at  $x^{(j)}$ . From each  $(x^{(j)}, z^{(j)})$  generate  $(u^{(j)}, z_u^{(j)}) = (x^{(j)} - \delta s^{(j)}, z^{(j)} + \delta)$  with label  $y_u^{(j)} = \text{sgn}(z_u^{(j)} - p(u^{(j)}))$  and  $(v^{(j)}, z_v^{(j)}) = (x^{(j)} + \delta s^{(j)}, z^{(j)} - \delta)$  with label  $y_v^{(j)} = \text{sgn}(z_v^{(j)} - p(v^{(j)}))$ .
4. Generate  $\alpha$  (depends on  $\delta$  and  $\beta$  from problem  $\mathcal{QP}$ ) and input the  $2m + 1$  points in  $\mathbb{R}^{n+1} \times \{\pm 1\}$  given by  $((u^{(j)}, z_u^{(j)}), y_u^{(j)}), ((v^{(j)}, z_v^{(j)}), y_v^{(j)})$  for each  $j \in [m]$  and  $(0, \alpha, +1)$  to the algorithm.

Figure 7: Reduction from the QP problem.

To argue the soundness and the completeness of our reduction, we will first analyze the robustness of degree-2 PTFs on the  $2m$  added labeled examples  $((u^{(\ell)}, z_u^{(\ell)}), y_u^{(\ell)})$  and  $((v^{(\ell)}, z_v^{(\ell)}), y_v^{(\ell)})$ . We will show that the “intended” PTF  $\text{sgn}(z - p(x))$  is the *unique* degree-2 PTF (up to scaling) that is robust at all these  $2m$  points. Note that a degree-2 PTF  $\text{sgn}(q(x, z))$  on the  $n + 1$  variables  $(x, z)$  may *not* necessarily be of the form  $\text{sgn}(z - g(x))$  for some degree-2 polynomial  $g(x)$ . We need to rule out the existence of any other degree-2 PTF of the form  $\text{sgn}(q(x, z))$  that is  $\delta$ -robust at these points. Once we have established this, we will then show that the “intended” PTF  $\text{sgn}(z - p(x))$  is  $\delta$ -robust at  $((0, \alpha), +1)$  in the YES case, and not  $\delta$ -robust at  $((0, \alpha), +1)$  in the NO case.

We proceed by first proving that the intended PTF  $\text{sgn}(z - p(x))$  is robust at the  $2m$  added examples. Recall that the points  $x^{(j)} \in \mathbb{R}^n$  are chosen according to a Gaussian distribution with variance  $\rho^2$  in every direction. The following lemma shows a property that holds w.h.p.

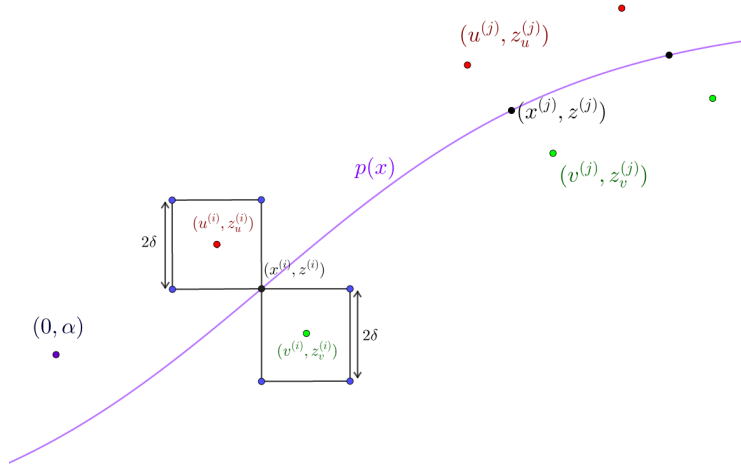

Figure 8: The figure shows the construction of a hard instance for the robust learning problem. First, points  $(x^{(j)}, z^{(j)})$  are sampled randomly and satisfying  $z^{(j)} = p(x^{(j)})$ . Each such point is then perturbed along the direction of the sign vector of the gradient at  $(x^j, z^{(j)})$  to get two data points of the training set, one labeled as +1, and the other labeled as -1.

for the points  $\{x^{(\ell)} : \ell \in [m]\}$  that will be key in proving the robustness of  $\text{sgn}(z - p(x))$  at the  $2m$  added points in Lemma G.11.

**Lemma G.9.** *There exists some universal constant  $C > 0$  such that for any  $\eta > 0$ , assuming  $\rho \geq C\delta n^{3/2}m/\eta$  we have with probability at least  $1 - \eta$  that*

$$\forall \ell \in [m], \forall i \in [n], \frac{|\langle A_i, x^{(\ell)} \rangle|}{\|A_i\|_1} > \delta, \quad (61)$$

where  $A_i$  denotes the  $i$ th row of  $A$ .

*Proof.* The proof follows from the following standard anti-concentration fact about Gaussians.

**Fact G.10.** *Let  $x^*$  be sampled from  $\mathcal{N}(0, \rho^2)^n$ . Let  $a \in \mathbb{R}^n$ . There exists a universal constant  $C > 0$  such that for any  $\eta' > 0$ ,*

$$\mathbb{P} \left[ |\langle a, x^* \rangle| \leq C \|a\|_2 \rho \eta' \right] \leq \eta'.$$

Set  $\eta' := \eta/(mn)$ . Fix  $\ell \in [m], i \in [n]$ . Using Fact G.10 we have with probability at least  $1 - \eta'$

$$|\langle A_i, x^{(j)} \rangle| \geq \|A_i\|_2 \rho \eta' \geq \frac{\|A_i\|_1}{\sqrt{n}} \cdot \rho \cdot \frac{\eta}{mn} \geq \delta,$$

from our assumption on  $\rho$ . The lemma follows from a union bound over all  $\ell \in [m], i \in [n]$ .  $\square$

We now prove the  $\delta$ -robustness of the “intended” degree-2 PTF  $\text{sgn}(z - p(x))$  at the  $2m$  added points w.h.p.

**Lemma G.11.** *There exists constant  $C > 0$  such that for any  $\eta > 0$ , assuming  $\rho \geq C\delta n^{3/2}m/\eta$ , then with probability at least  $1 - \eta$ , the degree-2 PTF  $\text{sgn}(z - p(x)) = \text{sgn}(z - x^T A x)$  is  $\delta$ -robust at all the  $2m$  points  $\{((u^{(\ell)}, z_u^{(\ell)}), y_u^{(\ell)}), ((v^{(\ell)}, z_v^{(\ell)}), y_v^{(\ell)}) : \ell \in [m]\}$ .*

*Proof.* Consider a fixed  $\ell \in [m]$ . For convenience let  $x^*, z^*, u, v, z_u, z_v$  denote  $x^{(\ell)}, z^{(\ell)}, u^{(\ell)}, v^{(\ell)}, z_u^{(\ell)}, z_v^{(\ell)}$  respectively, and let  $s = \text{sgn}(\nabla p(x^{(\ell)})) \in \{-1, 1\}^n$ . Hence  $z^* = x^{*T} A x^*$ ,  $(u, z_u) = (x^* - \delta s, z^* + \delta)$  and  $(v, z_v) = (x^* + \delta s, z^* - \delta)$ . We want to prove that the points

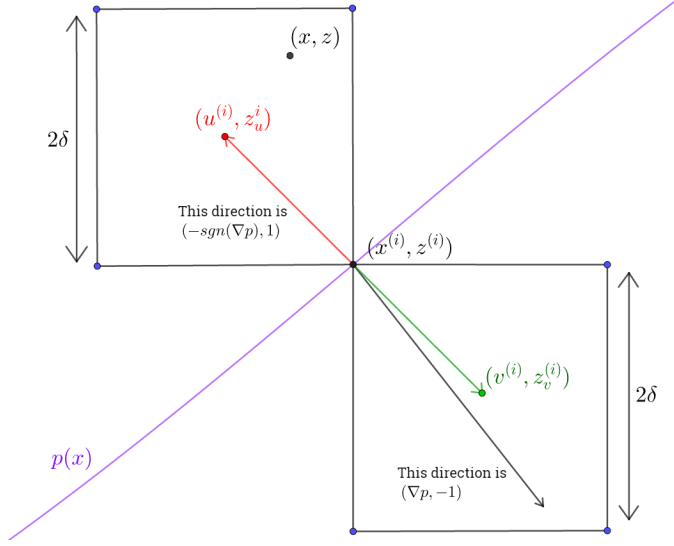

Figure 9: The figure shows the radius of robustness around the point  $(x^{(i)}, z^{(i)})$ . Any degree-2 PTF that is  $\delta$ -robust at all the data points, must take a value of  $+1$  in the upper ball around each  $(x^{(i)}, z^{(i)})$  of  $\ell_\infty$  radius of  $2\delta$  and must take a value of  $-1$  in the lower ball around each  $(x^{(i)}, z^{(i)})$  of  $\ell_\infty$  radius of  $2\delta$ . We use this fact to establish that such a PTF must pass through the points  $(x^{(i)}, z^{(i)})$ .

$(u, z_u)$  and  $(v, z_v)$  are  $\delta$  robust i.e., these points are  $\delta$  away in  $\ell_\infty$  distance from the decision boundary of  $\text{sgn}(z - p(x))$ . We now prove the following claim:

**Claim.** Any point  $(x, z) \in B_\infty^{n+1}(u, z_u)$  is on the ‘positive’ side i.e.,  $z - x^T A x > 0$ .

Note that  $(u, z_u)$  itself lies inside the ball, and hence the claim will show that  $\text{sgn}(z - x^T A x)$  is  $\delta$ -robust at  $(u, z_u)$ . An analogous proof also holds that  $\delta$ -robustness at  $(v, z_v)$ .

*Proof of Claim.* Let’s now define  $\tilde{x} = x - x^*$ ,  $\tilde{z} = z - z^*$ . A simple observation is that  $(x, z)$  lies on the opposite orthant with respect to  $(x^*, z^*)$  as  $s$ , and we have (as shown in Figure 9)

$$\forall j \in [d], -2\delta \leq s(j)\tilde{x}(j) \leq 0, \text{ and } \tilde{z} \geq 0.$$

Using  $z^* = p(x^*)$  and  $\tilde{z} \geq 0$ , for all  $(x, z) \in B_\infty^{n+1}((u, z_u), \delta)$  we have

$$\begin{aligned} z - p(x) &= z^* + \tilde{z} - p(\tilde{x} + x^*) = \tilde{z} + p(x^*) - p(\tilde{x} + x^*) = \tilde{z} - \langle \nabla p, \tilde{x} \rangle - \frac{1}{2} \tilde{x}^T \nabla^2 p \tilde{x} \\ &\geq - \sum_{i=1}^n \tilde{x}(i) \left( \sum_{j=1}^n a_{ij} x^*(j) \right) - \frac{1}{2} \sum_{i=1}^n \tilde{x}(i) \left( \sum_{j=1}^n a_{ij} \tilde{x}(j) \right) \\ &= \sum_{i=1}^n (-\tilde{x}(i) s(i)) \left| \sum_{j=1}^n a_{ij} x^*(j) \right| - \frac{1}{2} \sum_{i=1}^n \tilde{x}(i) \sum_{j=1}^n a_{ij} \tilde{x}(j) \\ &\geq \sum_{i=1}^n |\tilde{x}(i)| \left( \left| \sum_{j=1}^n a_{ij} x^*(j) \right| - \delta \sum_{j=1}^n |a_{ij}| \right), \end{aligned}$$

using the fact that  $\tilde{x}(i)s(i) \in [-2\delta, 0]$  for each  $i \in [n]$ . Applying Lemma G.9 we see that with probability at least  $(1 - \eta)$ , (61) holds, and hence  $|\langle x^*, A_i \rangle| > \delta \|A_i\|_1$  for each  $i \in [n]$  as required. This establishes the claim, and proves the lemma.  $\square$

We now prove that the “intended” PTF  $\text{sgn}(z - p(x))$  is the only degree-2 PTF that is robust at the added  $2m$  examples.

**Lemma G.12.** Consider any degree-2 PTF  $\text{sgn}(q(x, z))$  that is  $\delta$ -robust at the  $2m$  labeled points  $\{((u^{(\ell)}, z_u^{(\ell)}), +1) : \ell \in [m]\}$  and  $\{((v^{(\ell)}, z_v^{(\ell)}), -1) : \ell \in [m]\}$  and is consistent with their labels. Then  $q(x, z) = C(z - p(x))$  for some  $C \neq 0$ .

The proof of Lemma G.12 follows immediately from the following two lemmas (Lemma G.13 and Lemma G.14).

**Lemma G.13.** *Consider any degree-2 PTF on  $n+1$  variables  $\text{sgn}(q(x, z))$  that satisfies the conditions of Lemma G.12. Then  $q(x^{(\ell)}, z^{(\ell)}) = 0$  for each  $\ell \in [m]$ .*

*Proof.* Since  $\text{sgn}(q(u^{(\ell)}, z_u^{(\ell)})) \neq \text{sgn}(q(v^{(\ell)}, z_v^{(\ell)}))$ , by the Intermediate Value Theorem,

$$\exists \gamma \in [0, 1] \text{ s.t. } (\hat{x}, \hat{z}) = \gamma(u^{(\ell)}, z_u^{(\ell)}) + (1 - \gamma)(v^{(\ell)}, z_v^{(\ell)}) \text{ and } q(\hat{x}, \hat{z}) = 0.$$

Also, since  $q$  is  $\delta$ -robust at  $(u^{(\ell)}, z_u^{(\ell)})$  and  $(v^{(\ell)}, z_v^{(\ell)})$ , we must have that  $(\hat{x}, \hat{y})$  is at least  $\delta$  far away in  $\ell_\infty$  distance from both  $(u^{(\ell)}, z_u^{(\ell)})$  and  $(v^{(\ell)}, z_v^{(\ell)})$ . Further by design two points are separated by exactly  $2\delta$  in each co-ordinate (see Figure 9 for an illustration)! Hence it is easy to see that  $\gamma = 1/2$  i.e.,  $(\hat{x}, \hat{z}) = (x^{(\ell)}, z^{(\ell)})$  as required.  $\square$

We now show that  $q(x, z) = z - p(x)$  is the only polynomial over  $(n+1)$  variables that evaluates to 0 on all points  $\{(x^{(\ell)}, z^{(\ell)}) : \ell \in [m]\}$ . Together with Lemma G.13 this establishes the proof of Lemma G.12.

**Lemma G.14.** *Let  $m > (n+1)^2$  and let  $q : \mathbb{R}^{n+1} \rightarrow \mathbb{R}$  be any degree-2 polynomial with  $q(x^{(\ell)}, z^{(\ell)}) = 0$  for all  $\ell \in [m]$ , where  $z^{(\ell)} = (x^{(\ell)})^T A^* x^{(\ell)}$  and  $x^{(\ell)} \sim N(0, \rho^2)^n$  with  $\rho > 0$ . Then with probability 1,  $q(x, z) = C(z - x^T A^* x)$  for  $C \neq 0$ .*

*Proof.* We can represent a general degree-2 polynomial  $q : \mathbb{R}^{n+1} \rightarrow \mathbb{R}$  given by

$$q(x, z) = x^T A x + b_1^T x + c_1 + z b_2^T x + c_2 z^2 + c_3 z, \text{ where } x \in \mathbb{R}^n, z \in \mathbb{R}.$$

This polynomial is parameterized by a vector  $w = (A, b_1, c_1, b_2, c_2, c_3) \in \mathbb{R}^r$  where  $r = \binom{n+1}{2} + 2n + 3$  (since  $A$  is symmetric). Now given a point  $(x^{(\ell)}, z^{(\ell)})$ , the equation  $q(x^{(\ell)}, z^{(\ell)}) = 0$  is a linear equation over the coefficients  $w$  of  $q$ . Hence, the set of conditions  $q(x^{(\ell)}, z^{(\ell)}) = 0$  can be expressed as a systems of linear equations  $Mw = 0$  over the (unknown) co-efficients  $w$ . Hence any valid polynomial  $q$  corresponds to a solution of the linear system  $Mw = 0$  and vice-versa. We now describe the matrix  $M \in \mathbb{R}^{m \times r}$ . Define

$$f(x, z) := (1) \oplus (x_1, \dots, x_n) \oplus (x_i x_j : i \leq j \in [n]) \oplus (x_1 z, \dots, x_n z) \oplus (z^2), \oplus (z) \in \mathbb{R}^r, \\ \text{and } M_\ell := f(x^{(\ell)}, z^{(\ell)}) \forall \ell \in [m],$$

where  $u \oplus v$  refers to the concatenation of vectors  $u$  and  $v$ , and  $M_\ell$  represents the row  $\ell$  of  $M$ . In other words  $f(x, z) = (1, x_1, \dots, x_n, x_1^2, \dots, x_j x_k, \dots, x_n^2, x_1 z, \dots, x_j z, \dots, x_n z, z^2, z)$ , where  $x_j$  is the  $j$ th component of  $x$  and  $z = x^T A^* x$ . Observe that the “intended” polynomial  $q^*(x, z) = z - x^T A^* x$  is a valid solution to this system of equations. Hence, it will suffice to prove that  $M$  has rank exactly  $r - 1$  i.e.,  $M$  has full column rank minus one. First observe that as polynomials over the formal variables  $x, z$ , *all but one* of the columns of  $f$  are linearly independent – in fact the only linear dependency in  $f(x, z)$  corresponds to the column  $z$  that can be expressed as a linear combination of degree-2 monomials  $\{x_i x_j : i \leq j\}$  since  $z := x^T A^* x$  is a homogenous degree-2 polynomial. Further the columns  $\{x_j z : j \in [n]\}$  have degree 3 and  $z^2$  has degree 4. Hence excluding the column corresponding to  $z$ , it is easy to see that the rest of the columns are linearly independent (either they correspond to different monomials, or the degrees are different). Now define  $g(x, z), M'$  analogously to  $f(x, z)$  and  $M$  respectively, without the last column that corresponds to  $z$  i.e.,

$$g(x, z) := (1) \oplus (x_1, \dots, x_n) \oplus (x_i x_j : i \leq j \in [n]) \oplus (x_1 z, \dots, x_n z) \oplus (z^2) \in \mathbb{R}^{r-1}, \\ \text{and } M'_\ell := g(x^{(\ell)}, z^{(\ell)}) \forall \ell \in [m].$$

From our earlier discussion, the columns of  $g(x, z)$  when seen as polynomials over the formal variables  $x, z$  are linearly independent. Hence, it suffices to prove the following claim:

**Claim:**  *$M'$  has full column rank i.e., rank of  $M'$  is  $r$ .*

To see why the claim holds consider the first  $\ell$  rows of the matrix  $M'$  and look at their span  $S(R_\ell)$ . If  $\ell \leq r - 1$  then the space orthogonal to  $S(R_\ell)$  i.e.,  $S(R_\ell)^\perp$  is non-empty. Consider any direction  $v$  in  $S(R_\ell)^\perp$ .

$$\langle v, M'_{\ell+1} \rangle = \widehat{q}(x^{(\ell+1)}, z^{(\ell+1)}), \text{ where } \widehat{q}(x, z) := \langle v, g(x, z) \rangle$$

is a non-zero polynomial of degree 2 in  $x, z$  (it is not identically zero because the columns of  $g(x, z)$  are linearly independent as polynomials over  $x, z$ ). Hence using a standard result about multivariate polynomials evaluated at randomly chose points (See Fact G.15), we get that  $\widehat{q}(x^{(\ell+1)}, z^{(\ell+1)}) \neq 0$  and so  $\langle v, M'_{\ell+1} \rangle \neq 0$  with probability 1. Taking a union bound over all the  $\ell \in \{1, \dots, r\}$  completes the proof.  $\square$

**Fact G.15.** *A non-zero multivariate polynomial  $p : \mathbb{R}^n \rightarrow \mathbb{R}$  evaluated at a point  $x \sim N(0, \rho^2)^n$  with  $\rho > 0$  evaluates to zero with zero probability.*

We remark that the statement of Lemma G.14 can also be made robust to inverse polynomial error by using polynomial anti-concentration bounds (e.g., Carbery-Wright inequality) instead of Fact G.15; however this is not required for proving NP-hardness. We now complete the proof of Theorem G.7.

*Proof of Theorem G.7.* We start with the NP-hardness of  $\mathcal{QP}$ , and for the reduction in Figure 7, we will show that in the YES case, we will show that there is a  $\delta$ -robust degree-2 PTF (completeness), and in the NO case we will show that there is no  $\delta$  robust degree-2 PTF (soundness). As a reminder, the NP-hard problem  $\mathcal{QP}$  is the following: given a symmetric matrix  $A \in \mathbb{R}^{n \times n}$  with zeros on diagonals, and  $\beta > 0$  distinguish whether

**No Case :** there exists an assignment  $y^*$  with  $\|y^*\|_\infty \leq 1$  such that  $q(y^*) = (y^*)^T A y^* > \beta$ ,

**Yes Case :**  $\max_{\|y\|_\infty \leq 1} y^T A y < \beta$ .

*Completeness (Yes Case):* Consider the degree-2 PTF given by  $\text{sgn}(z - p(x)) = \text{sgn}(z - x^T A x)$ . From Lemma G.11, we have that it is  $\delta$  robust at the  $2m$  points  $\{(u^{(\ell)}, z_u^{(\ell)}), y_u^{(\ell)} : \ell \in [m]\}$  and  $\{(v^{(\ell)}, z_v^{(\ell)}), y_v^{(\ell)} : \ell \in [m]\}$  with probability at least  $1 - \eta$  (for  $\eta$  being any sufficiently small constant). Further, from multilinearity of  $p$  we have that,

$$\begin{aligned} \max_{\|y\|_\infty \leq \delta} y^T A y &= \delta^2 \max_{\|y\|_\infty \leq 1} y^T A y < \delta^2 \beta = \alpha - \delta. \\ \text{Hence } (\alpha - \delta) - \max_{\|y\|_\infty \leq \delta} y^T A y &> 0, \end{aligned}$$

which establishes robustness at  $((0, \alpha), +1)$  for  $\text{sgn}(z - x^T A x)$ . Hence  $\text{sgn}(z - p(x))$  is  $\delta$ -robust at the  $2m + 1$  points with probability at least  $1 - \eta$  (for  $\eta$  being any sufficiently small constant).

*Soundness (No Case):* From Lemma G.12, we see that the degree-2 PTF given by  $\text{sgn}(z - p(x)) = \text{sgn}(z - x^T A x)$  is the only degree-2 PTF that can potentially be robust at all the  $2m + 1$  points with probability 1. Again analyzing robustness at the example  $((0, \alpha), +1)$ , we see that from multilinearity of  $p$ ,

$$\begin{aligned} \max_{\|y\|_\infty \leq \delta} y^T A y &= \delta^2 \max_{\|y\|_\infty \leq 1} y^T A y > \delta^2 \beta = \alpha - \delta. \\ \text{Hence } (\alpha - \delta) - \max_{\|y\|_\infty \leq \delta} y^T A y &< 0, \end{aligned}$$

which shows that the degree-2 PTF  $\text{sgn}(z - p(x))$  is *not* robust at  $(0, \alpha)$ . Hence there is no  $\delta$ -robust degree-2 PTF at the  $2m + 1$  given points, with probability 1. This completes the analysis of the reduction, and establishes the theorem.  $\square$

**Stronger Hardness.** We now prove the robust lower bound stated below.

**Theorem G.16.** *[Stronger Hardness] For every  $\delta > 0$  and  $\varepsilon \in (0, \frac{2}{3})$ , assuming  $NP \neq RP$  there is no polynomial time algorithm that given a set of  $N = \text{poly}(n, 1/\varepsilon)$  labeled points  $\{(x^{(1)}, y^{(1)}), \dots, (x^{(N)}, y^{(N)})\}$  in  $\mathbb{R}^{n+1} \times \{-1, 1\}$  such that there is a degree-2 PTF with  $\delta$ -robust empirical error of 0, can output a degree-2 PTF that has  $\delta$ -robust empirical error of at most  $\varepsilon$  on these  $N$  points.*

*Proof.* The proof of this theorem closely follows the proof of Theorem G.7 (the  $\varepsilon = 0$  case), so we only point out the differences here. The reduction uses the same gadget (Figure 7) used in Theorem G.7. The main challenge is the soundness analysis (NO case), where we need to rule out the existence of degree-2 PTFs which are  $\delta$ -robust and consistent at all but an  $\varepsilon$  fraction of the points. To handle this, we introduce “redundancy” by including more points (of both kinds) to ensure that even when an arbitrary  $\varepsilon$  fraction of these points are ignored (the PTF makes errors on them), we can still use the arguments in the soundness analysis of Theorem G.7.

Recall that our reduction (see Figure 7) generated two sets of points. We have one point of the form  $(0, \alpha)$  (let us denote this type as *Type A*) and  $m$  pairs of points  $\{(u^{(\ell)}, z_u^{(\ell)}), (v^{(\ell)}, z_v^{(\ell)}) : \ell \in [m]\}$  which are obtained by modifying  $(x^{(\ell)}, z^{(\ell)} = p(x^{(\ell)}))$  with  $x^{(\ell)}$  generated randomly (let us denote these  $2m$  points as of *Type B*).

Set  $N_1 := n^3, N_2 := 2n^3$ . In our modified instance, we will have  $N_1$  points of Type A i.e.,  $N_1$  identical points  $(0, \alpha)$  (note that we can also perturb these points slightly so that they are all distinct, if required). Further, we will have  $N_2$  points of Type B i.e., we will generate  $N_2/2$  pairs of points  $\{(u^{(\ell)}, z_u^{(\ell)}) : \ell \in [N_2/2]\}$  which are generated as described in Figure 7 after drawing  $x^{(\ell)} \sim N(0, \rho^2)^n$  for  $\ell \in [N_2/2]$  (here a larger  $\rho = O(\delta n^{3/2} N_2)$  will suffice). Hence, we have in total  $N = N_1 + N_2 = 3n^3$  points.

The *completeness* analysis (YES case) is identical to that of Theorem G.7, as  $\text{sgn}(z - p(x))$  will be  $\delta$ -robust at all of the  $N$  points (from Lemma G.11 and our choice of  $\alpha$ ).

We now focus on the *soundness* analysis (NO case). From  $\varepsilon < \frac{1}{3}$  and our choice of  $N_1$  and  $N_2$ ,

$$N_1 > \varepsilon(N_1 + N_2) \tag{62}$$

$$(1 - \varepsilon)(N_1 + N_2) > N_1 + \frac{N_2}{2} + (n + 1)^2 \tag{63}$$

From (63) and a pigeonhole argument, any subset of size  $(1 - \varepsilon)(N_1 + N_2)$  is guaranteed to have  $(n + 1)^2$  pairs of points of the form  $(u^{(\ell)}, z_u^{(\ell)})$  and  $(v^{(\ell)}, z_v^{(\ell)})$ . This is because the LHS of (63) represents a lower bound on the number of points the candidate degree-2 PTF is robust on. The RHS of (63) represents the number of points needed to ensure that at least  $(n + 1)^2$  pairs of points from Type B are picked. Hence using Lemma G.12 along with a union bound over all the  $\binom{N_2}{(n+1)^2}$  choices of the pairs (note that the failure probability in Lemma G.14 is 0), the “intended” PTF  $\text{sgn}(z - p(x))$  is the only surviving degree-2 PTF.

Again from (62) and the pigeonhole principle, any  $(1 - \varepsilon)$  fraction of the points will contain *at least one* point of the Type A i.e.,  $(0, \alpha)$ . Hence in the NO case, the “intended” PTF  $\text{sgn}(z - p(x))$  is not  $\delta$ -robust. This completes the soundness analysis and establishes the theorem. □
